# Supplementary material for: Stereoselective approach to aminocyclopentitols from Garner aldehydes
Source: Royal Society of Chemistry journal article supplement (doi:10.1039/c3ra40648b), 2013-01-01
Supplement: c3ra40648b.pdf [file c3ra40648b.pdf]

# Supporting Information

## **Stereoselective Approach to Aminocyclopentitols from Garner aldehydes<sup>#</sup>**

**Sanjit Kumar Das and Gautam Panda\***

*Medicinal and Process Chemistry Division, CSIR-Central Drug  
Research Institute, Lucknow-226001, UP, India*

*e-mail: [gautam.panda@gmail.com](mailto:gautam.panda@gmail.com), [gautam\\_panda@cdri.res.in](mailto:gautam_panda@cdri.res.in)*

|                    |             |
|--------------------|-------------|
| <b>1. Contents</b> | <b>2-4</b>  |
| <b>2. Spectra</b>  | <b>5-28</b> |

## Contents

Fig 1:  $^1\text{H}$  NMR Spectra of Compound 3a.

Fig 2:  $^{13}\text{C}$  NMR Spectra of Compound 3a.

Fig 3:  $^1\text{H}$  NMR Spectra of Compound 7a.

Fig 4:  $^{13}\text{C}$  NMR Spectra of Compound 7a.

Fig 5:  $^1\text{H}$  NMR Spectra of Compound 7b.

Fig 6:  $^{13}\text{C}$  NMR Spectra of Compound 7b.

Fig 7:  $^1\text{H}$  NMR Spectra of Compound 10a.

Fig 8:  $^{13}\text{C}$  NMR Spectra of Compound 10a.

Fig 9:  $^1\text{H}$  NMR Spectra of Compound 11a.

Fig 10:  $^{13}\text{C}$  NMR Spectra of Compound 11a.

Fig 11: DEPT NMR Spectra of Compound 11a.

Fig 12:  $^1\text{H}$  NMR Spectra of Compound 2a.

Fig 13:  $^{13}\text{C}$  NMR Spectra of Compound 2a.

Fig 14:  $^1\text{H}$  NMR Spectra of Compound 2b.

Fig 15:  $^{13}\text{C}$  NMR Spectra of Compound 2b.

Fig 16:  $^1\text{H}$  NMR Spectra of Compound 9a.

Fig 17:  $^{13}\text{C}$  NMR Spectra of Compound 9a.

Fig 18:  $^1\text{H}$  NMR Spectra of Compound 9b.

Fig 19:  $^{13}\text{C}$  NMR Spectra of Compound 9b.

Fig 20:  $^1\text{H}$  NMR Spectra of Compound 1a.

Fig 21:  $^{13}\text{C}$  NMR Spectra of Compound 1a.

Fig 22:  $^1\text{H}$  NMR Spectra of Compound 1b.

Fig 23:  $^{13}\text{C}$  NMR Spectra of Compound 1b.

Fig 24:  $^1\text{H}$  NMR Spectra of Compound 12b.

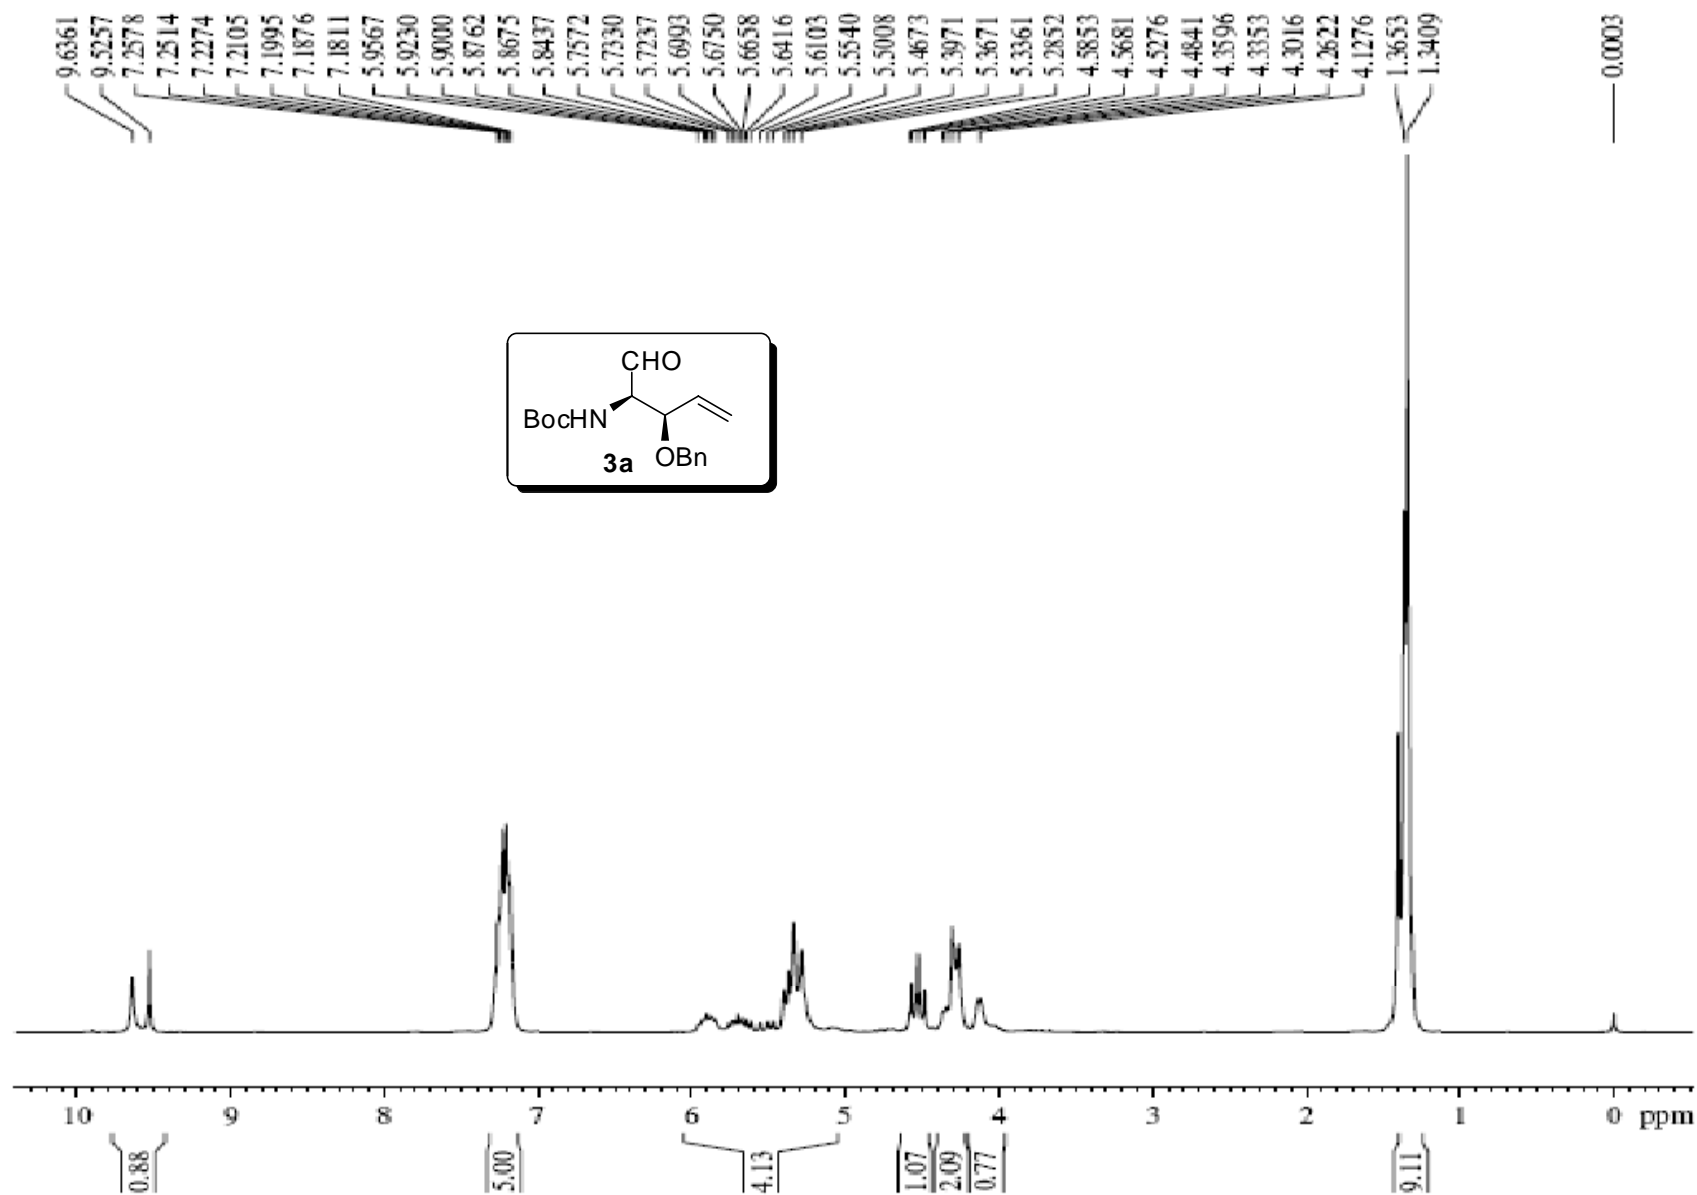

**Fig 1:  $^1\text{H}$  NMR of Compound 3a.**

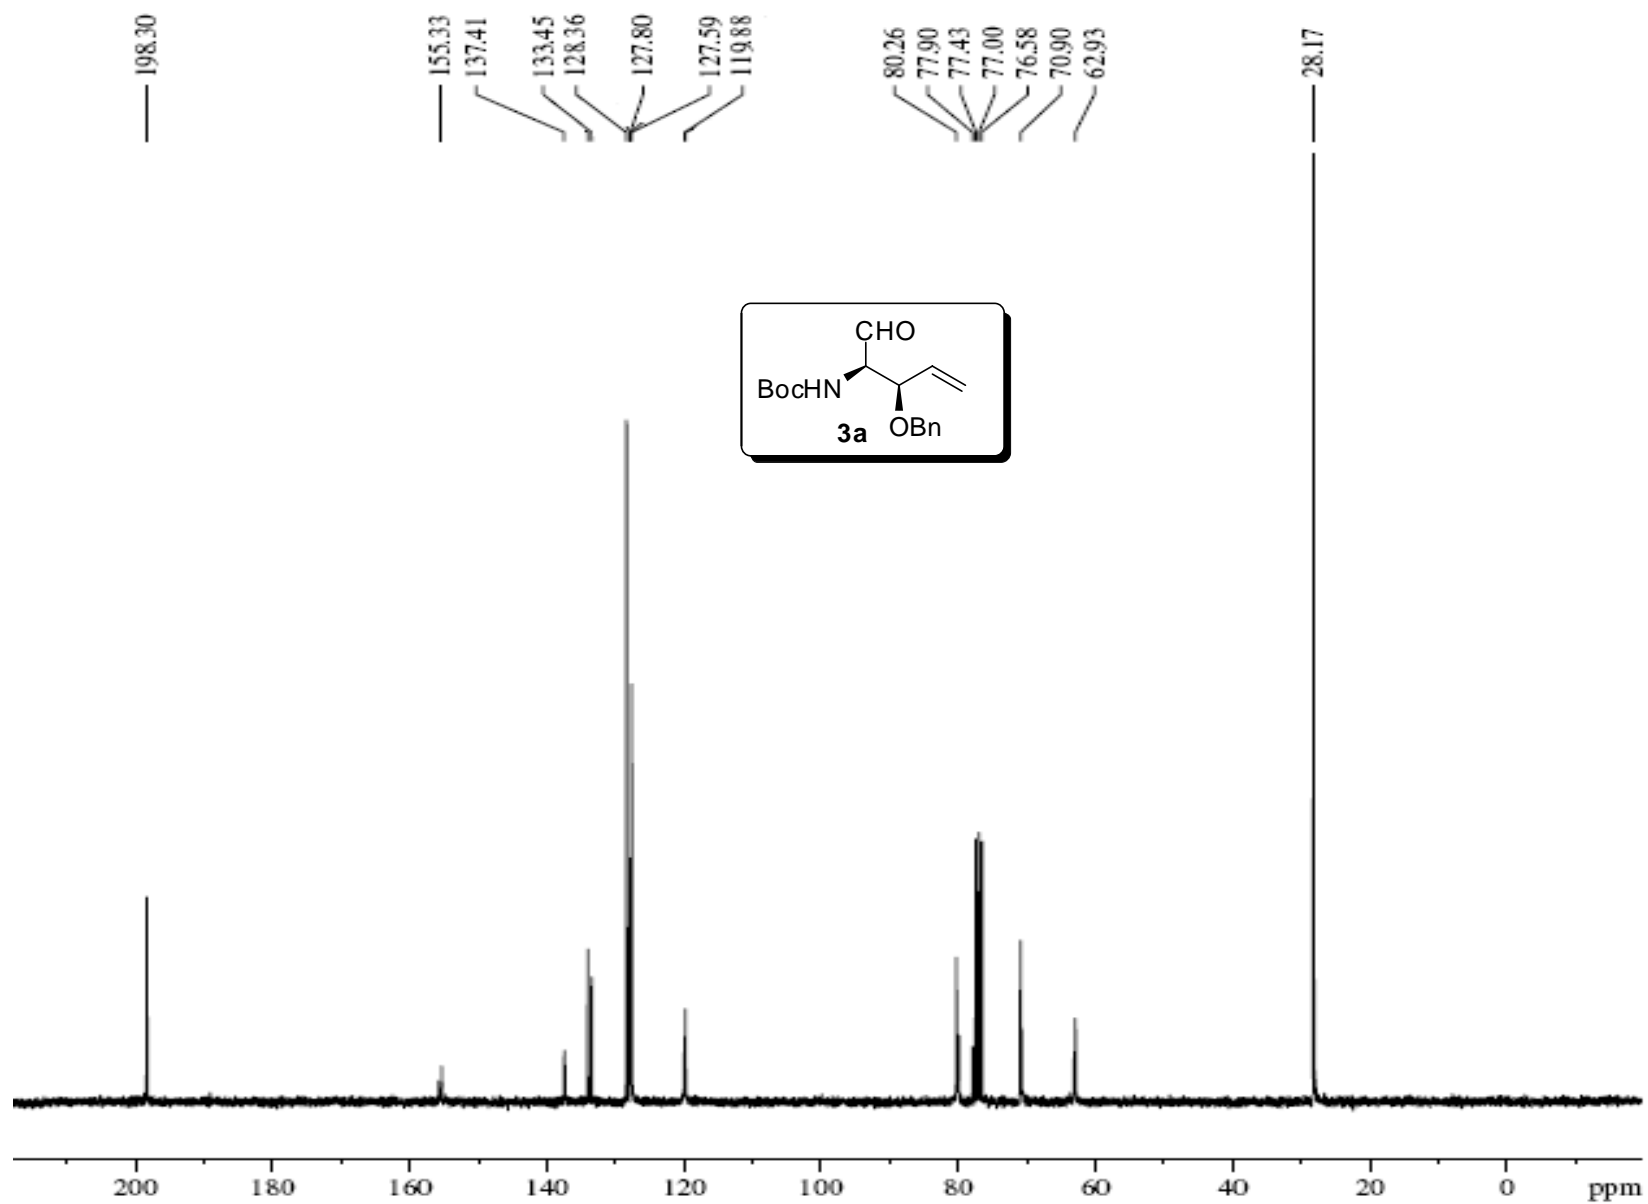

**Fig 2:**  $^{13}\text{C}$  NMR Spectra of Compound 3a.

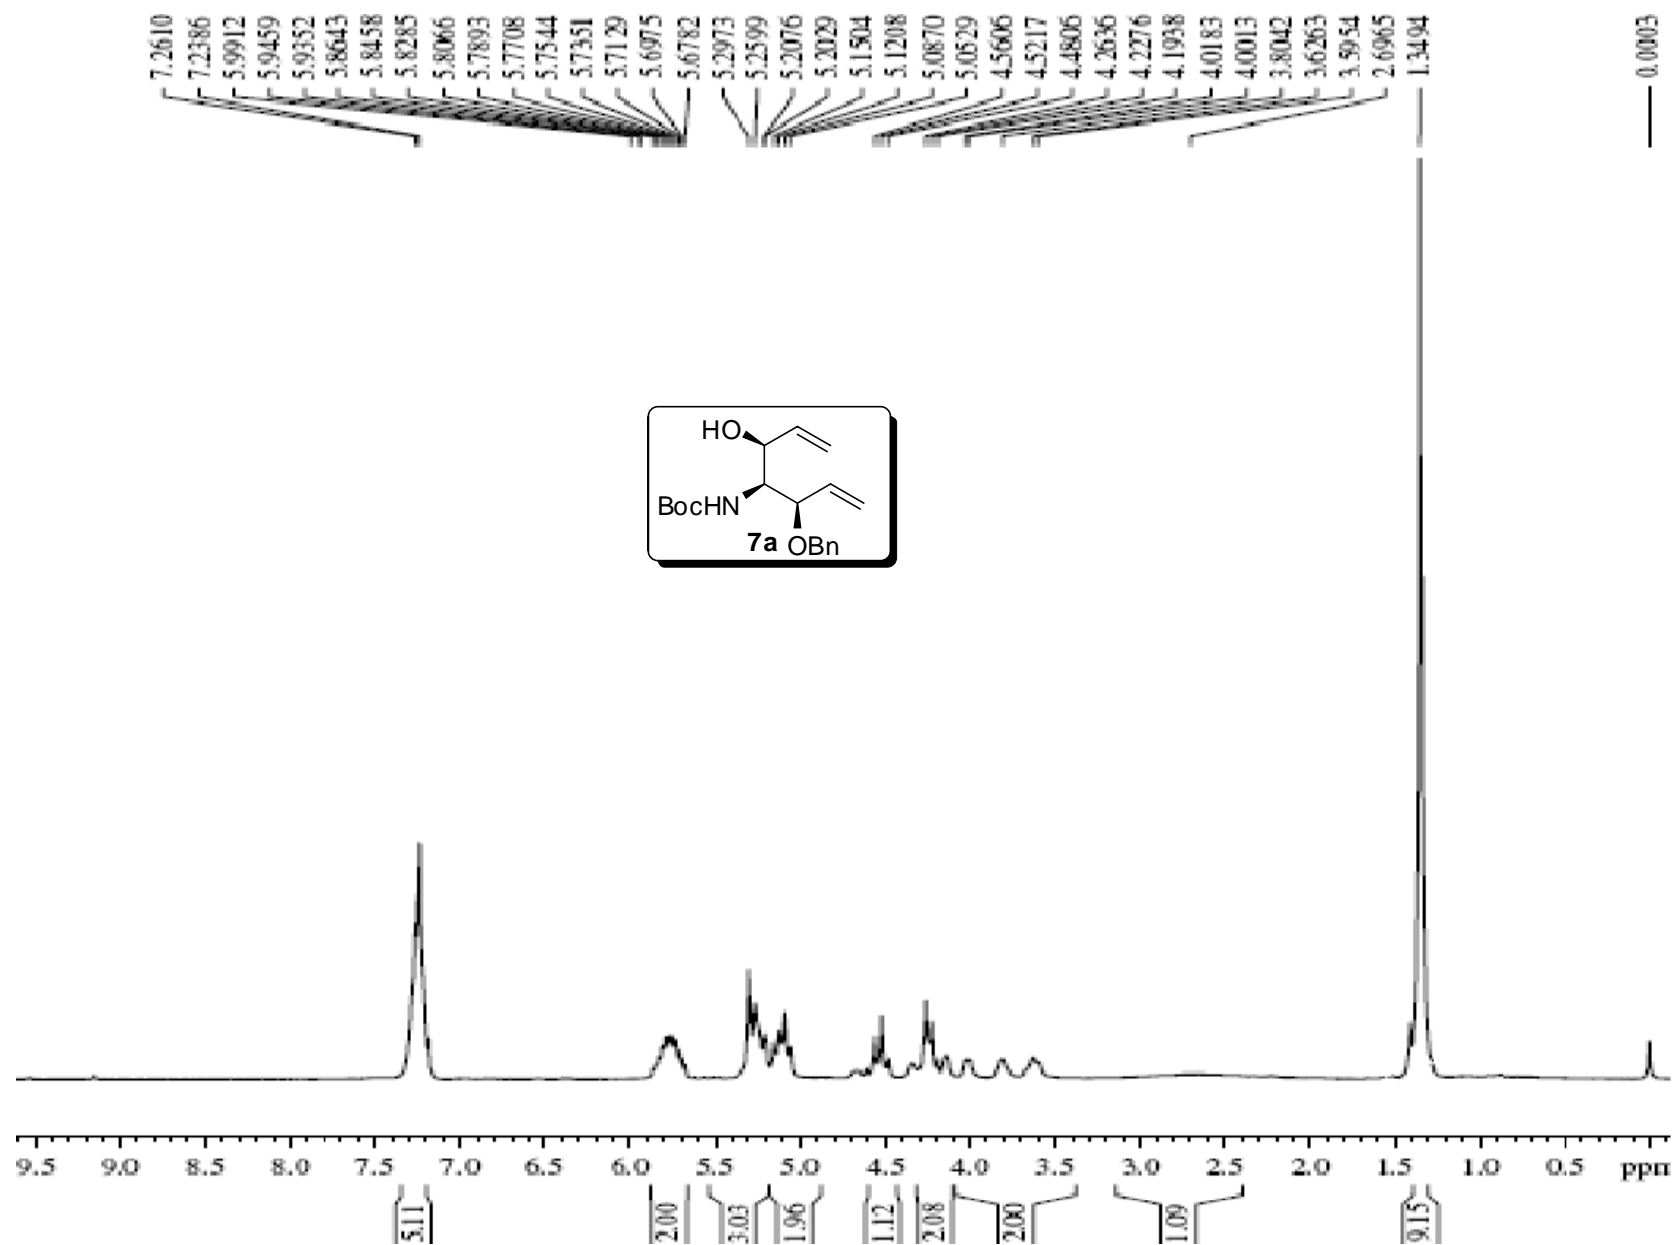

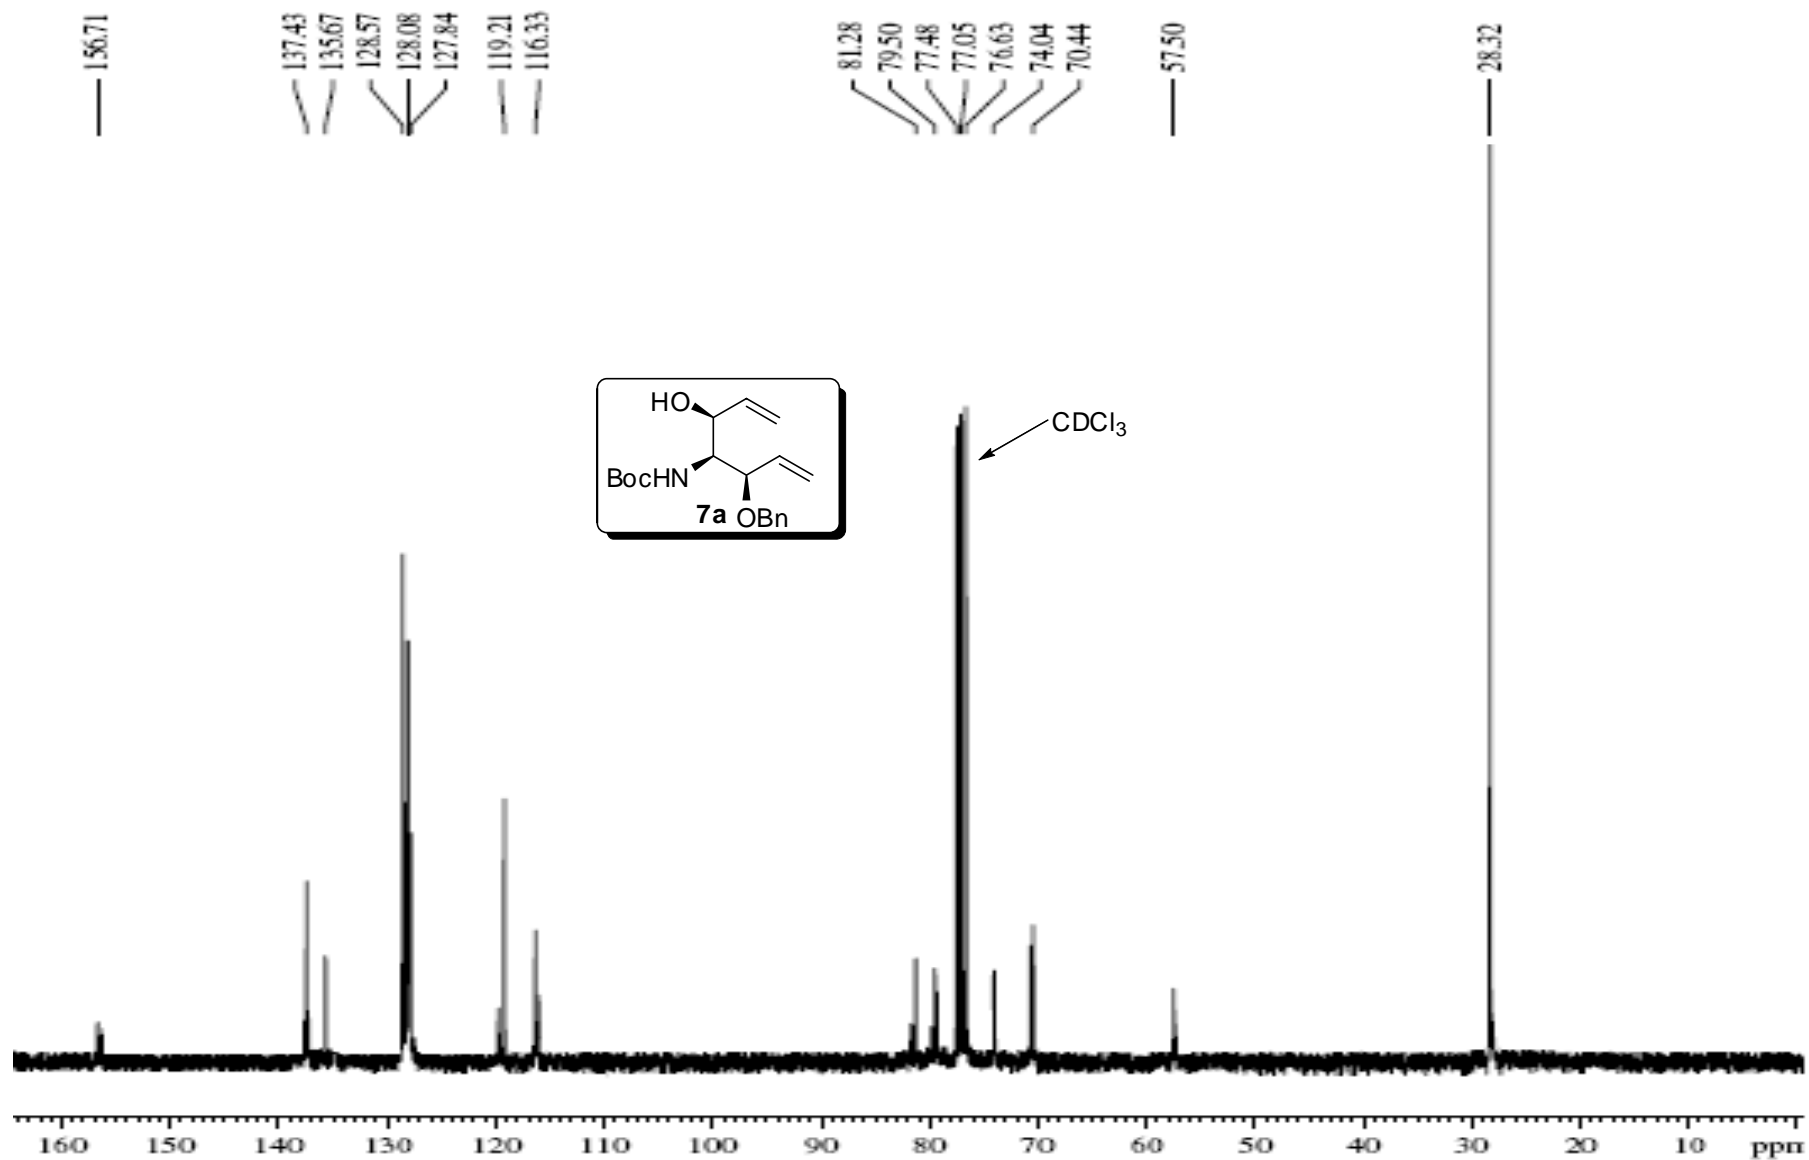

**Fig 4:** <sup>13</sup>C NMR Spectra of Compound 7a.



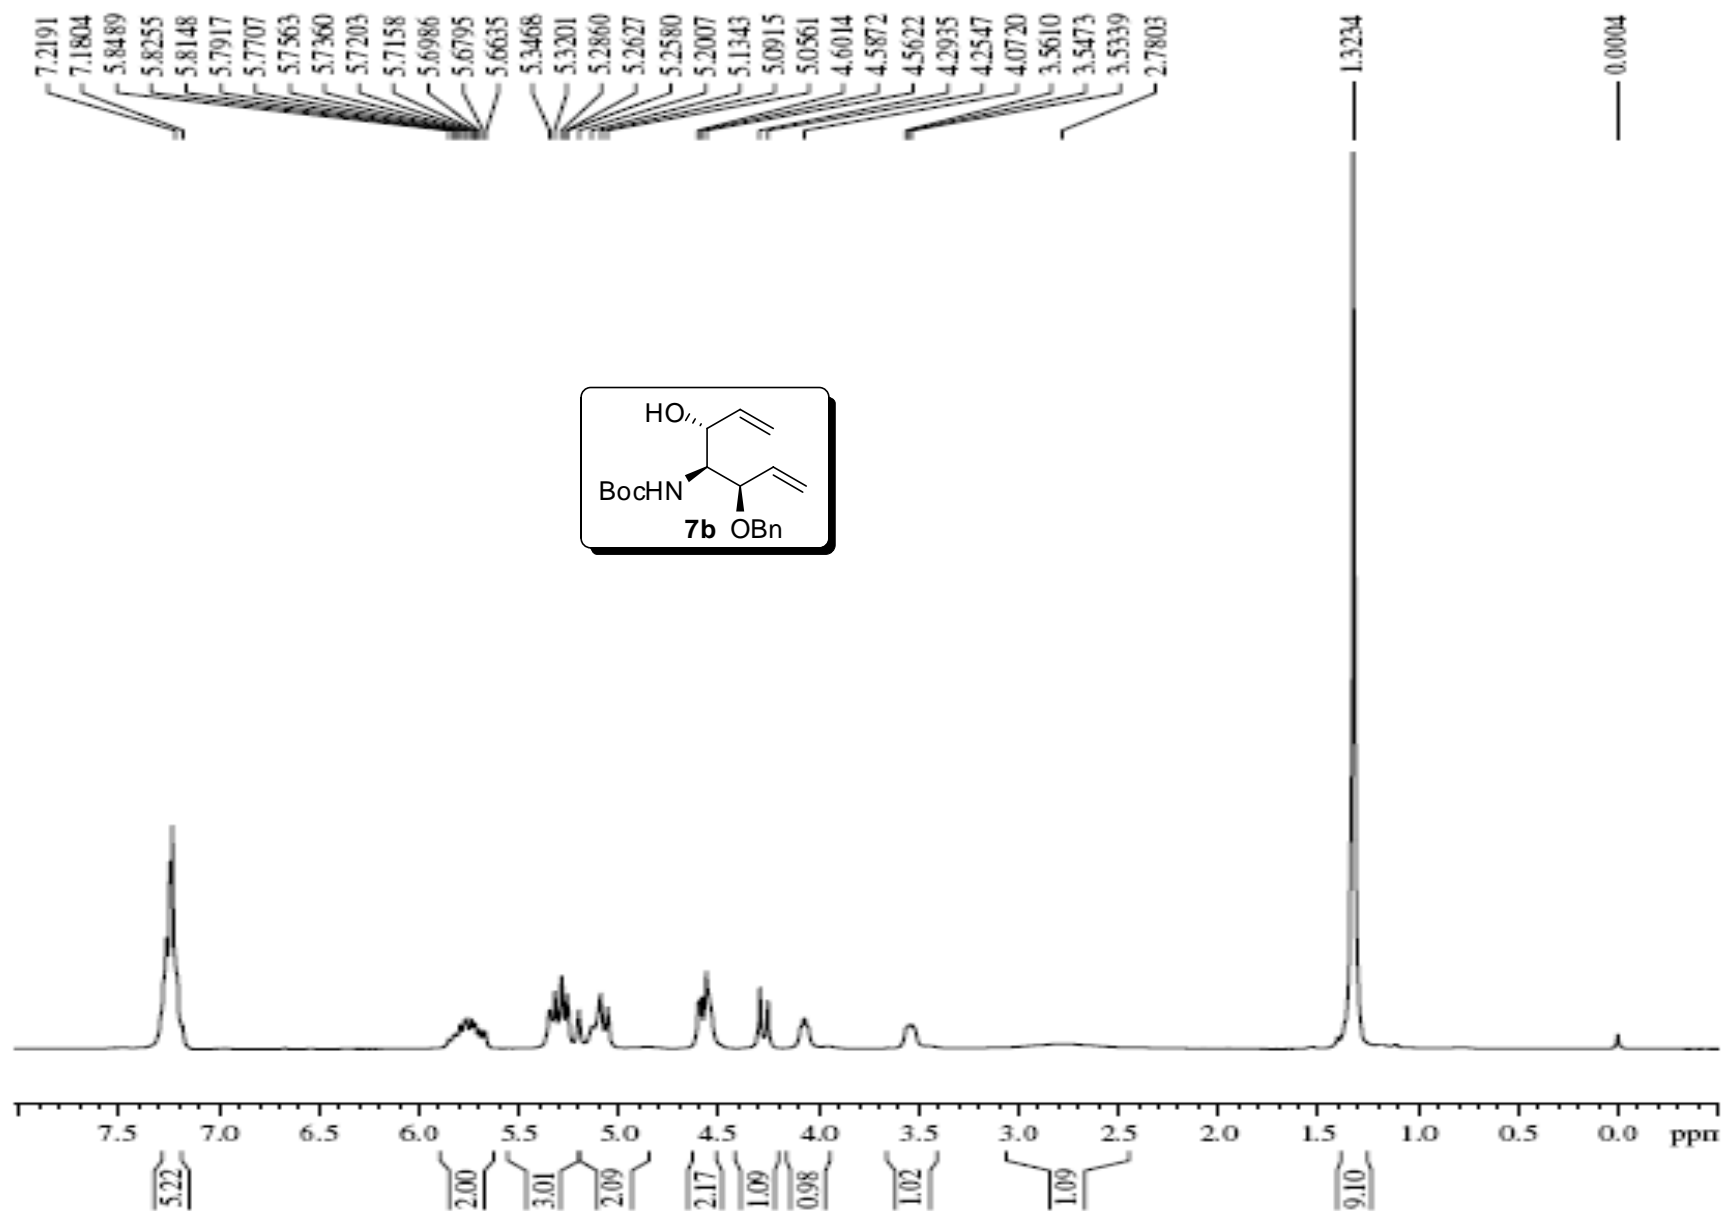

**Fig 5:  $^1\text{H}$  NMR of Compound 7b.**

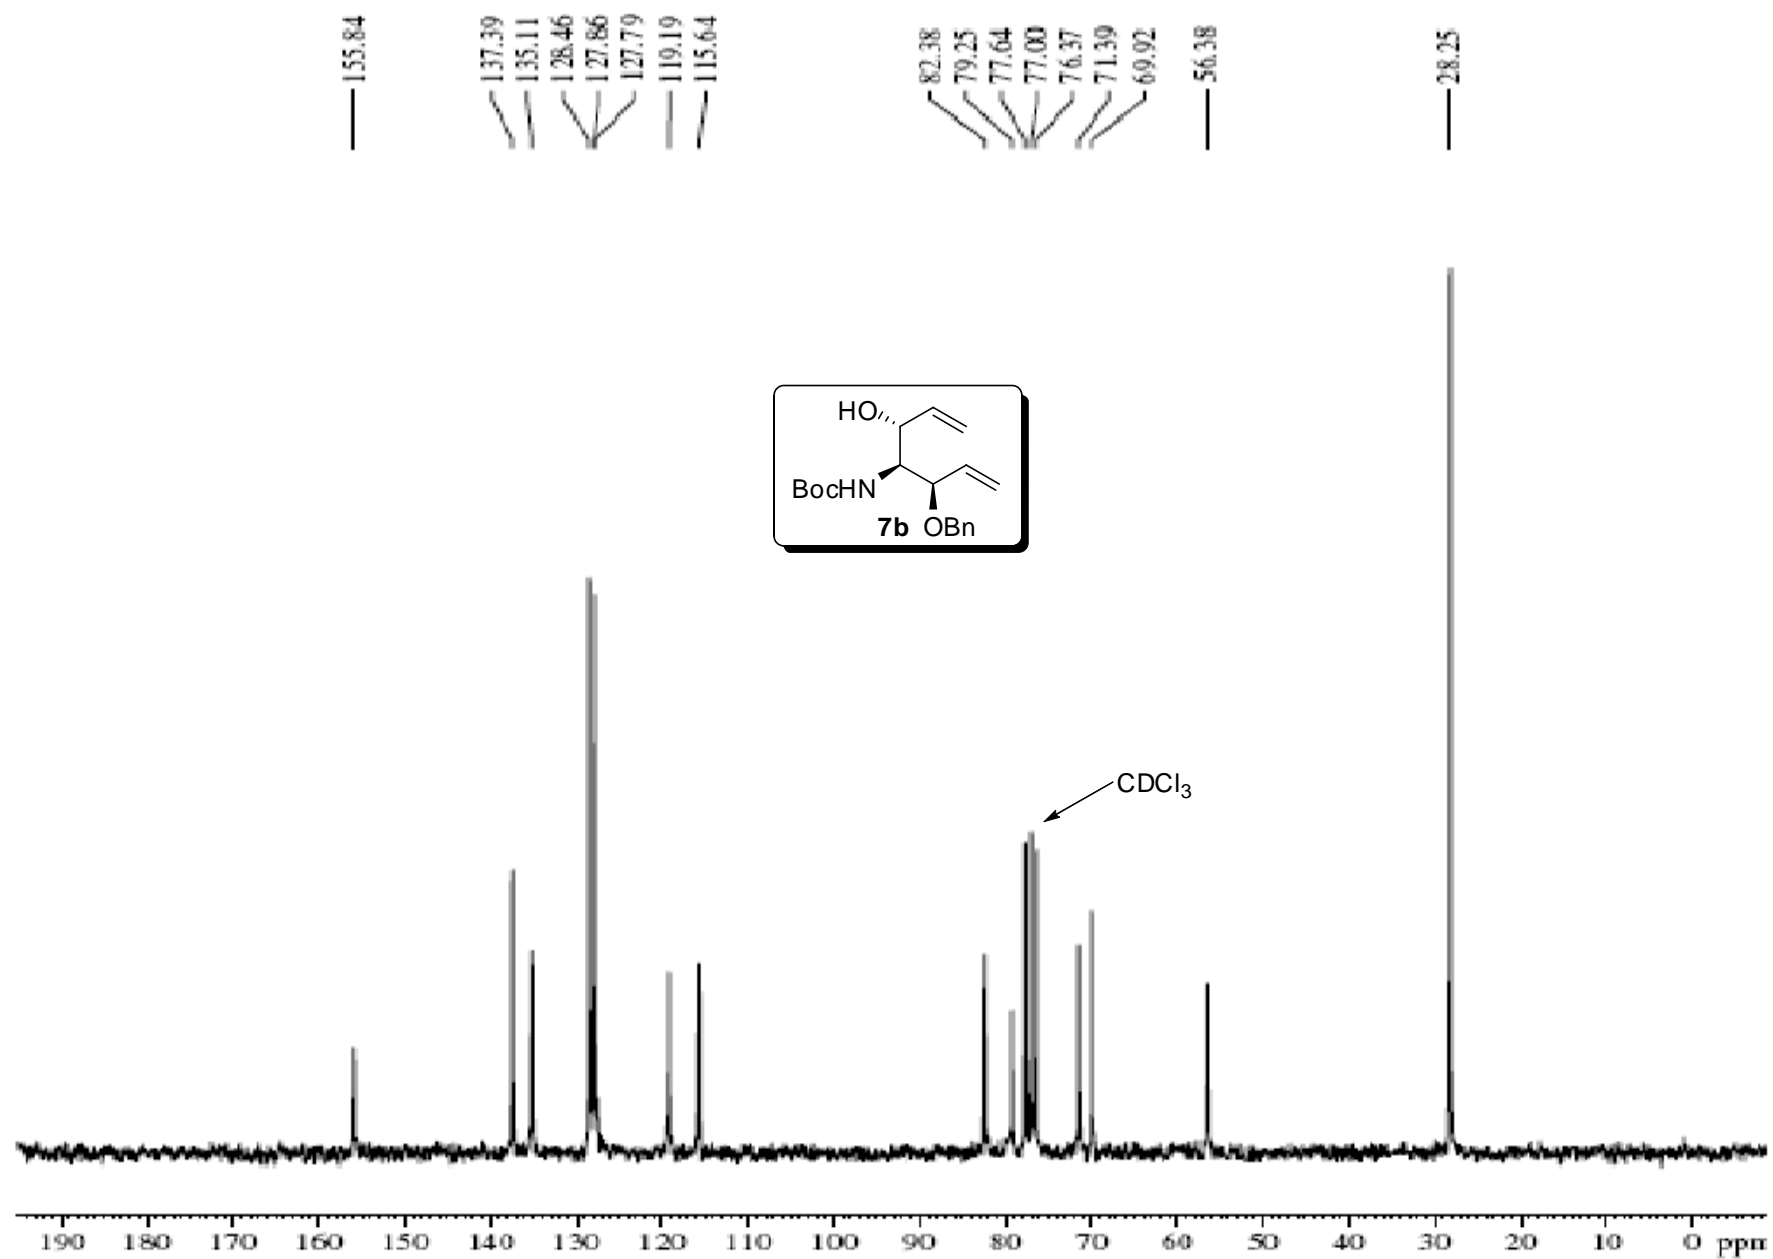

**Fig 6:**  $^{13}\text{C}$  NMR Spectra of Compound **7b**.

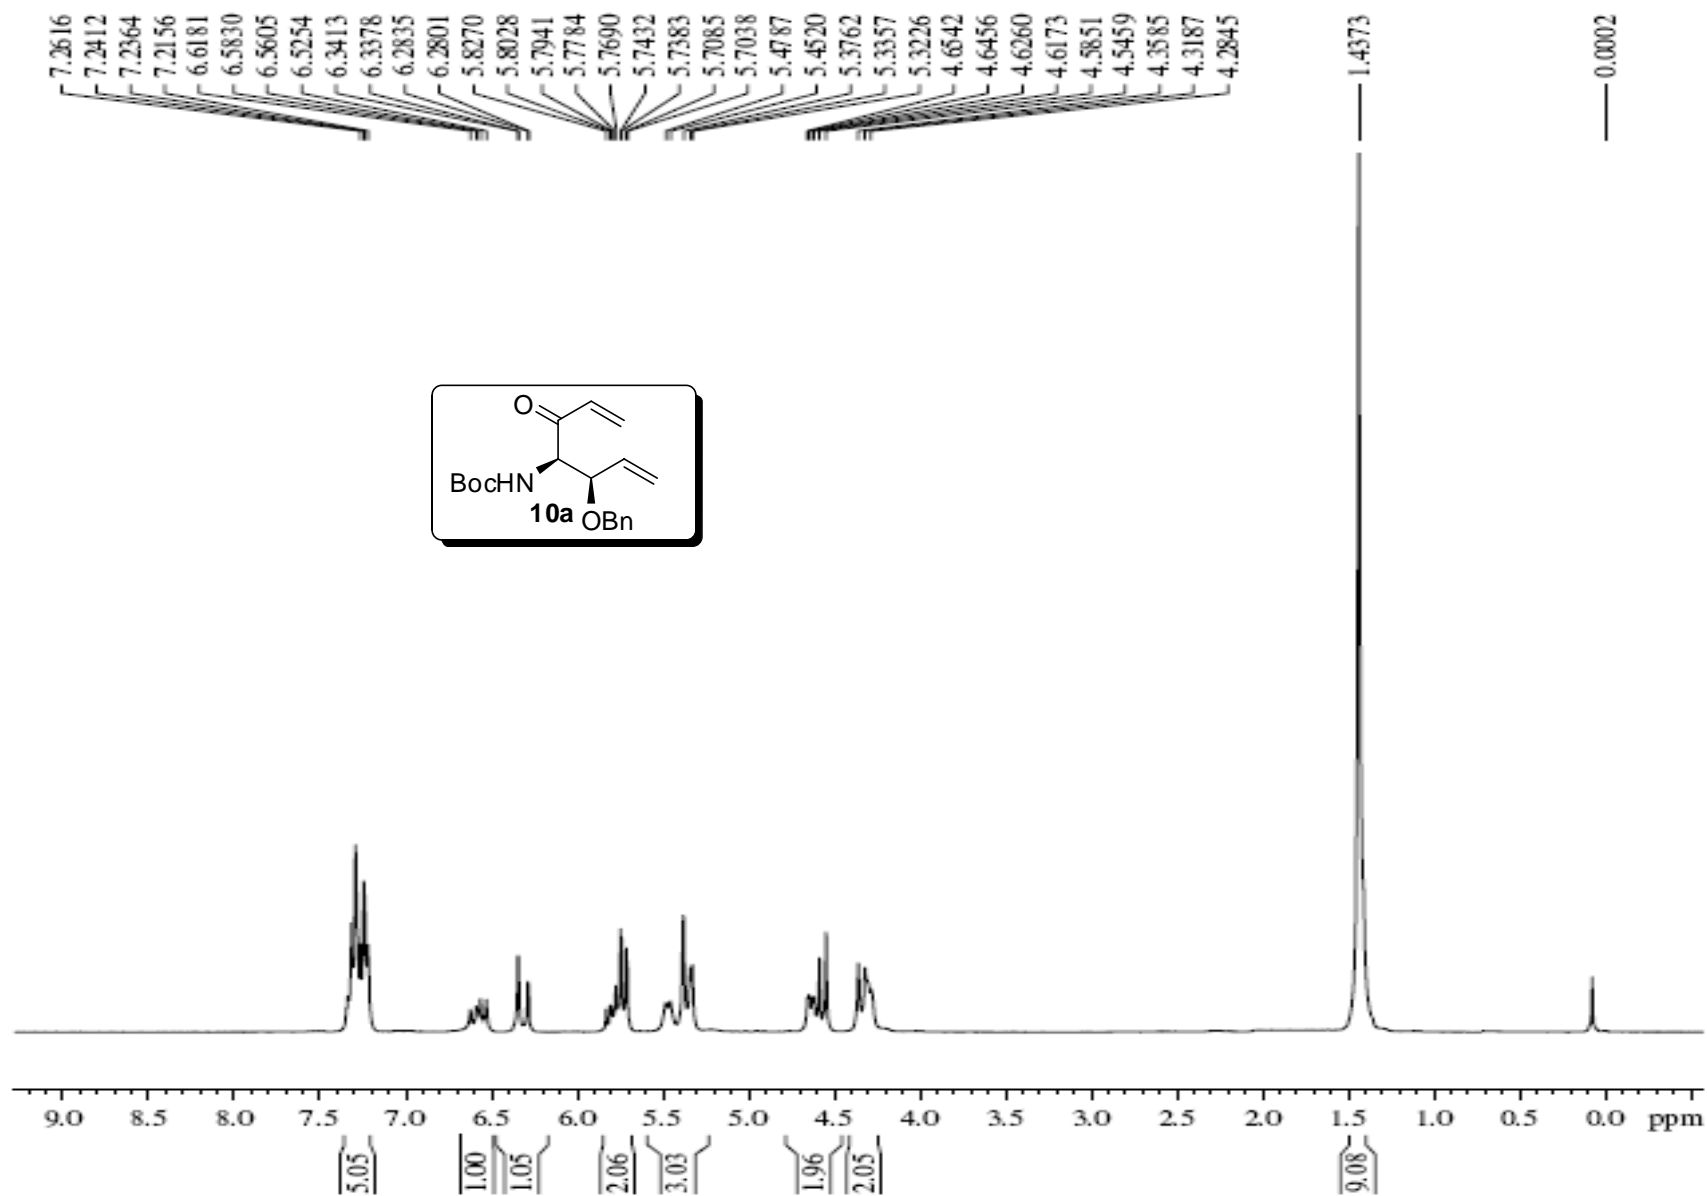

**Fig 7:  $^1\text{H}$  NMR of Compound 10a.**

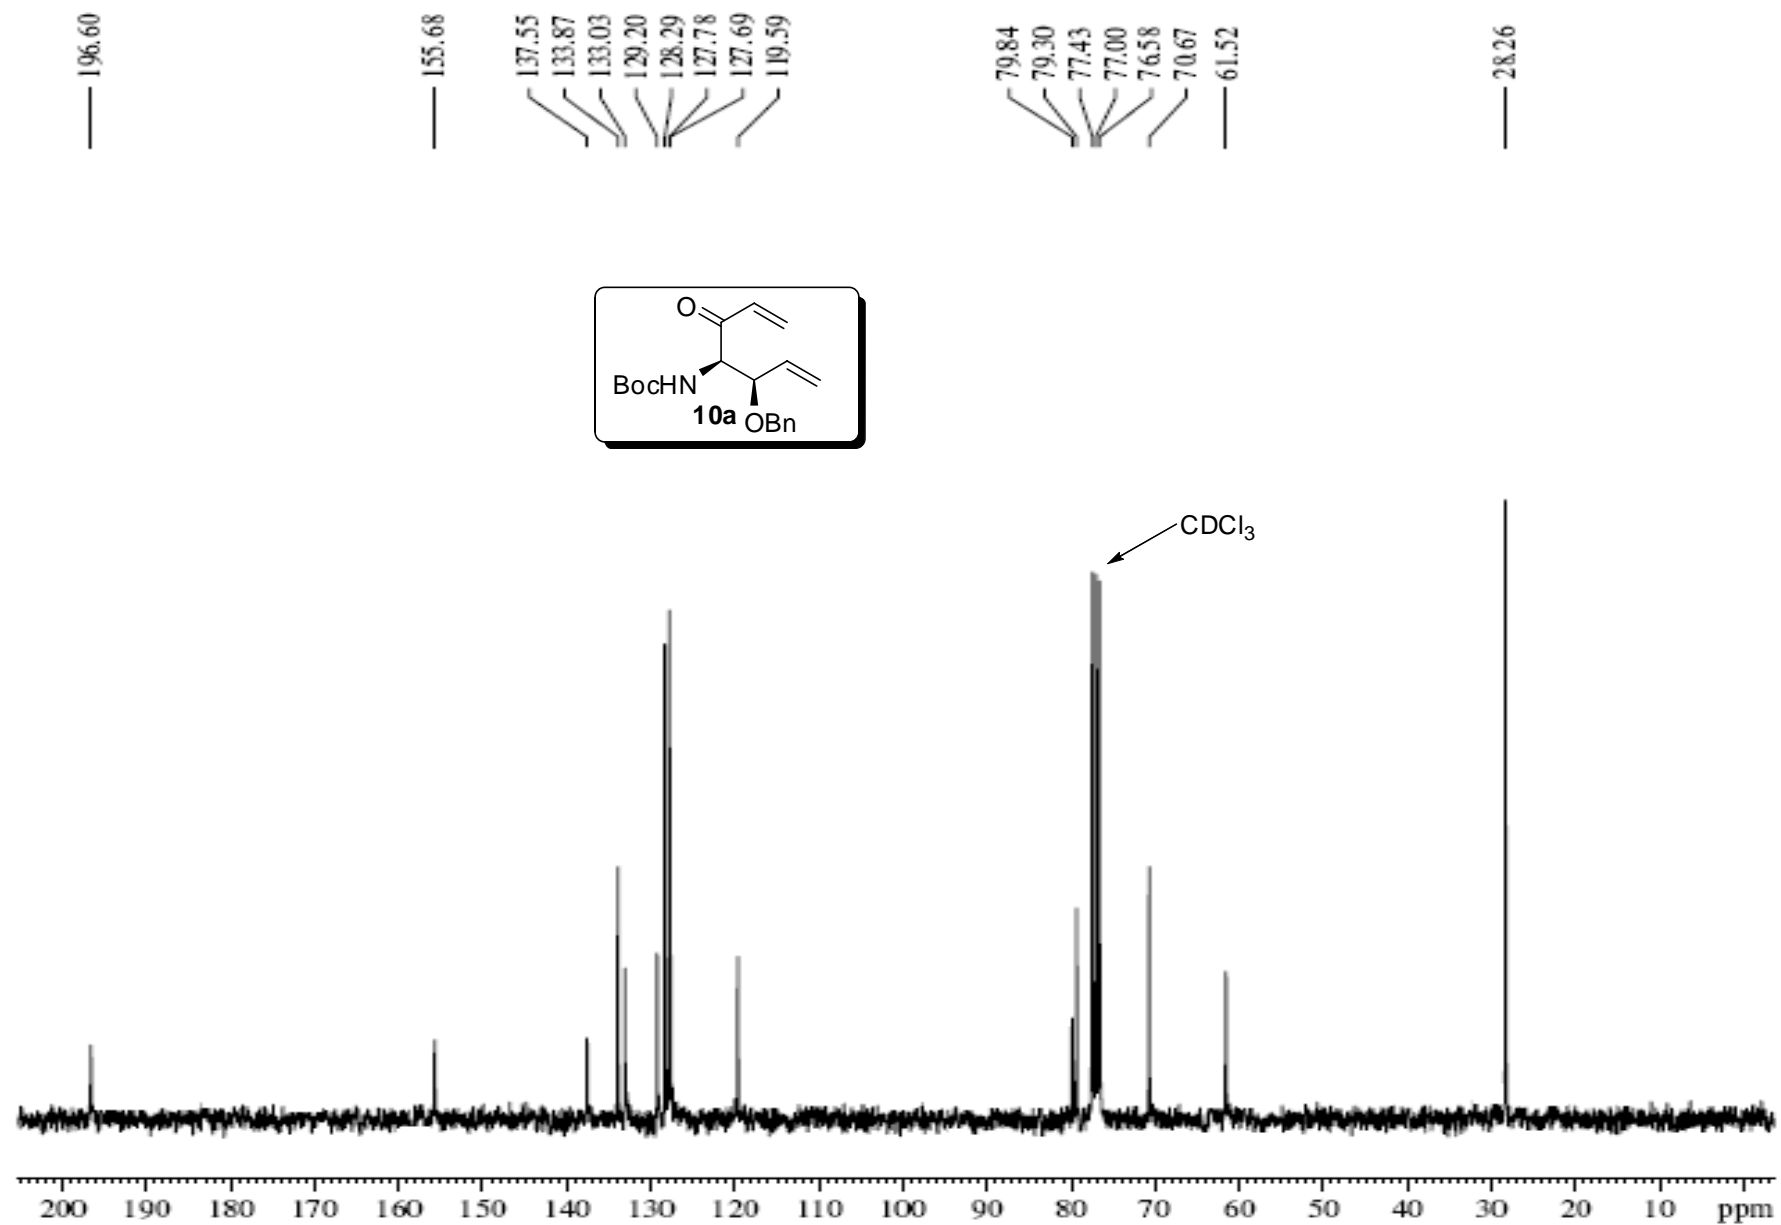

**Fig 8:**  $^{13}\text{C}$  NMR Spectra of Compound 10a.

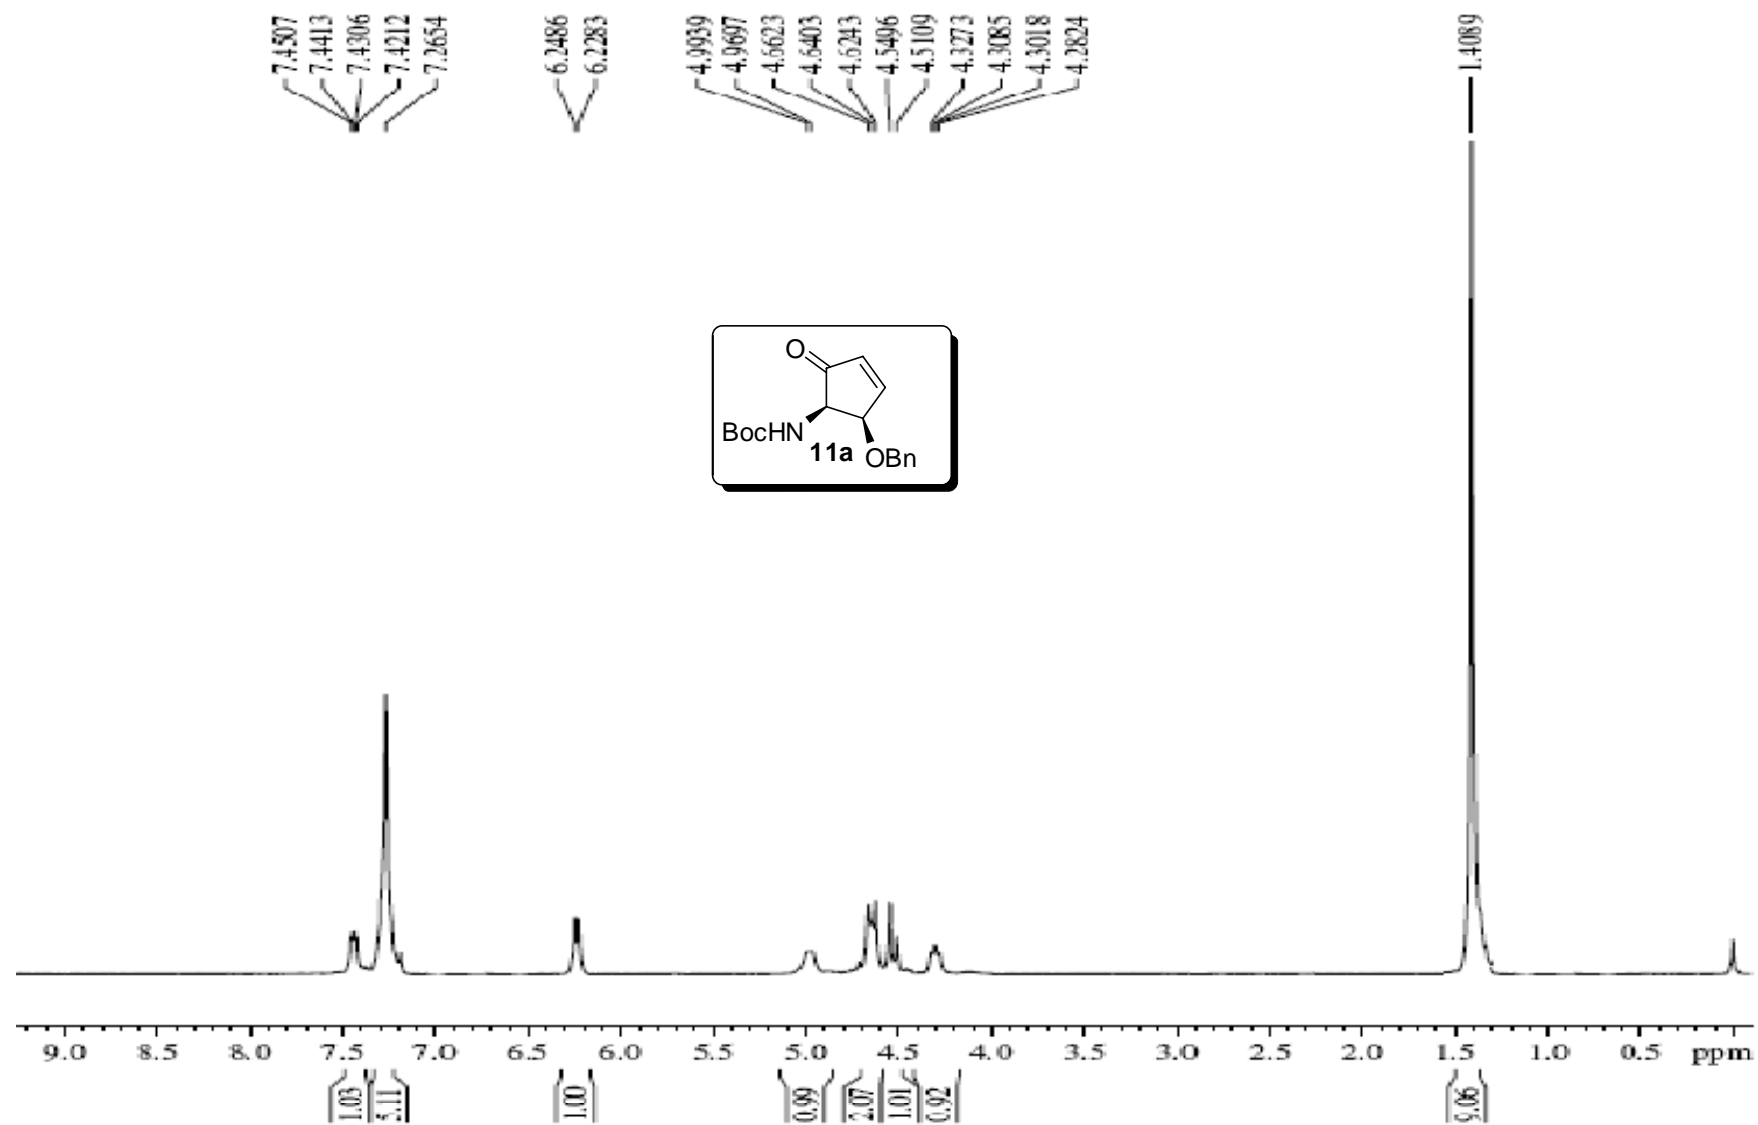

**Fig 9: <sup>1</sup>H NMR of Compound 11a.**

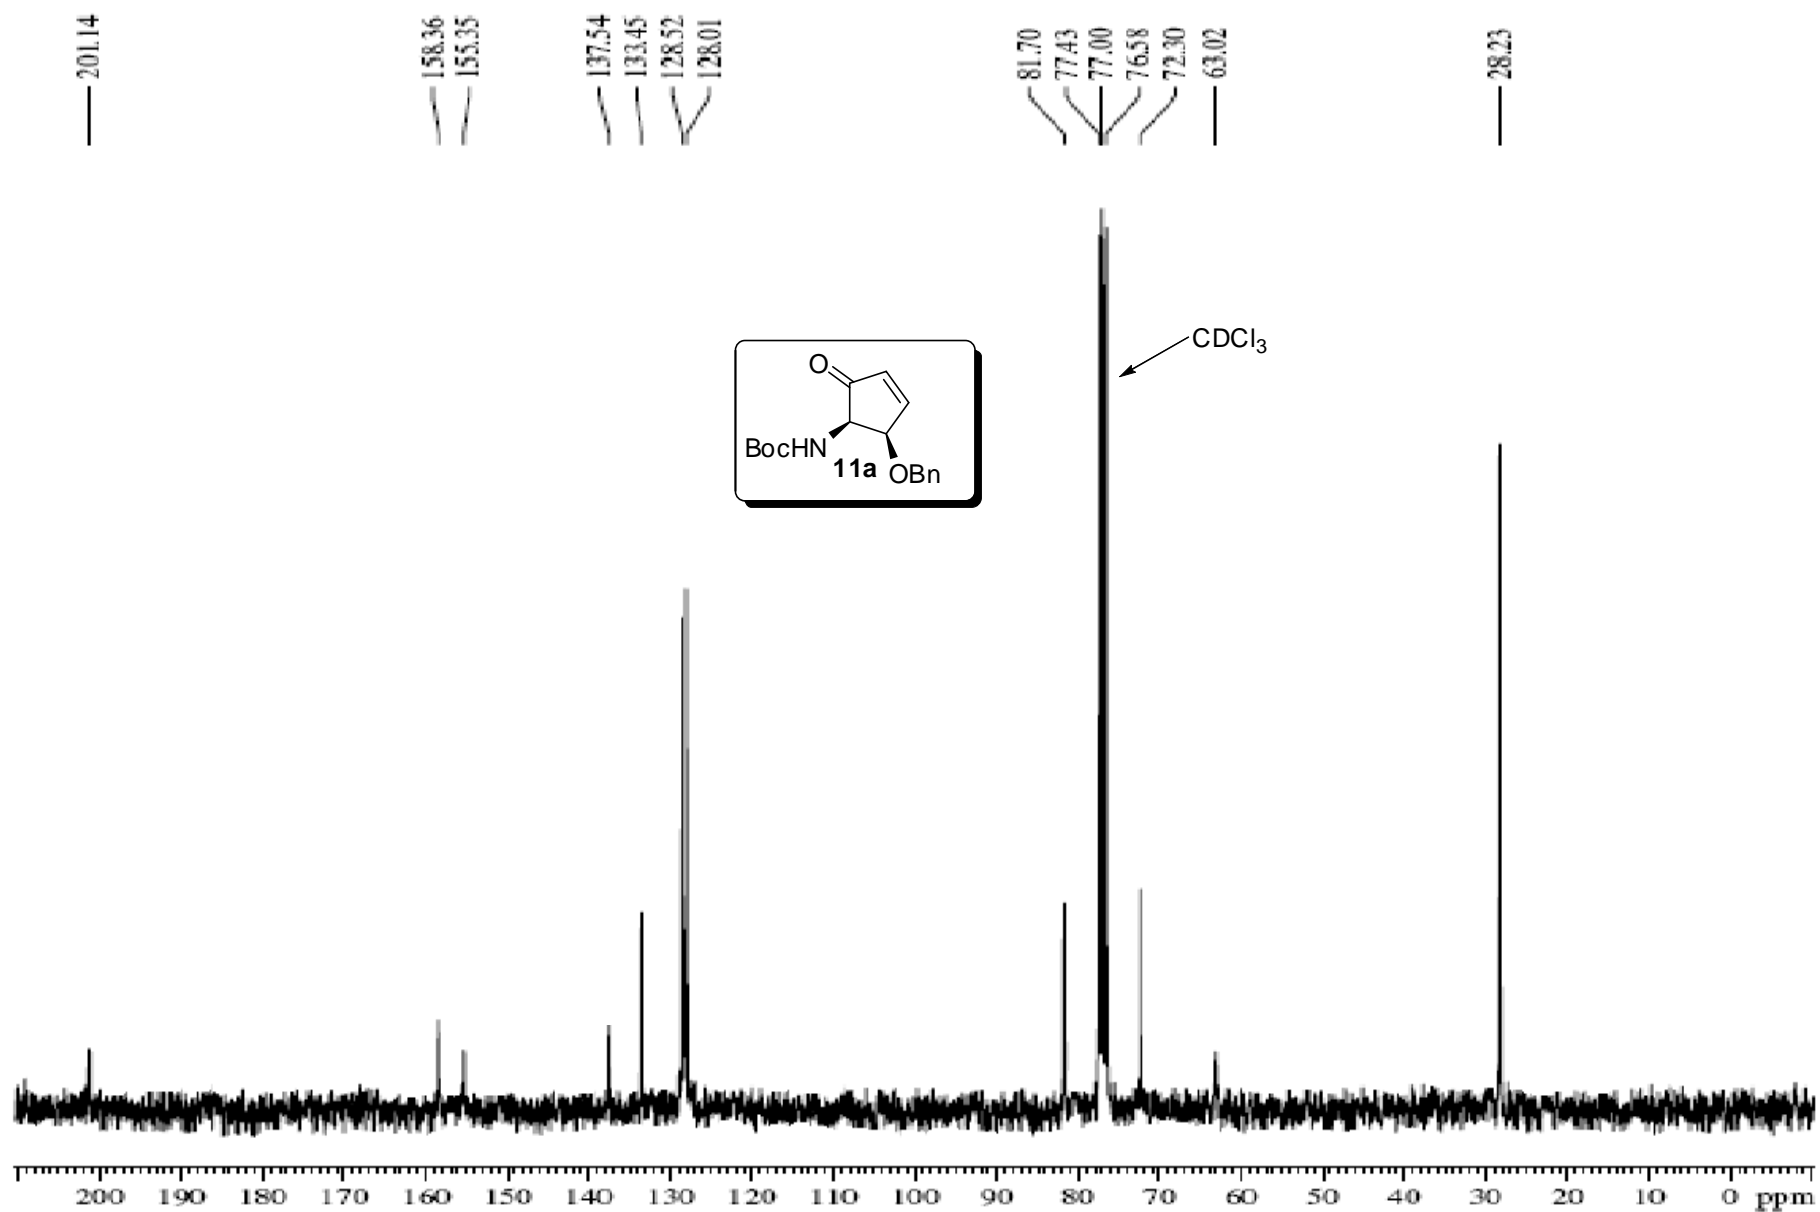

**Fig 10: <sup>13</sup>C NMR Spectra of Compound 11a.**

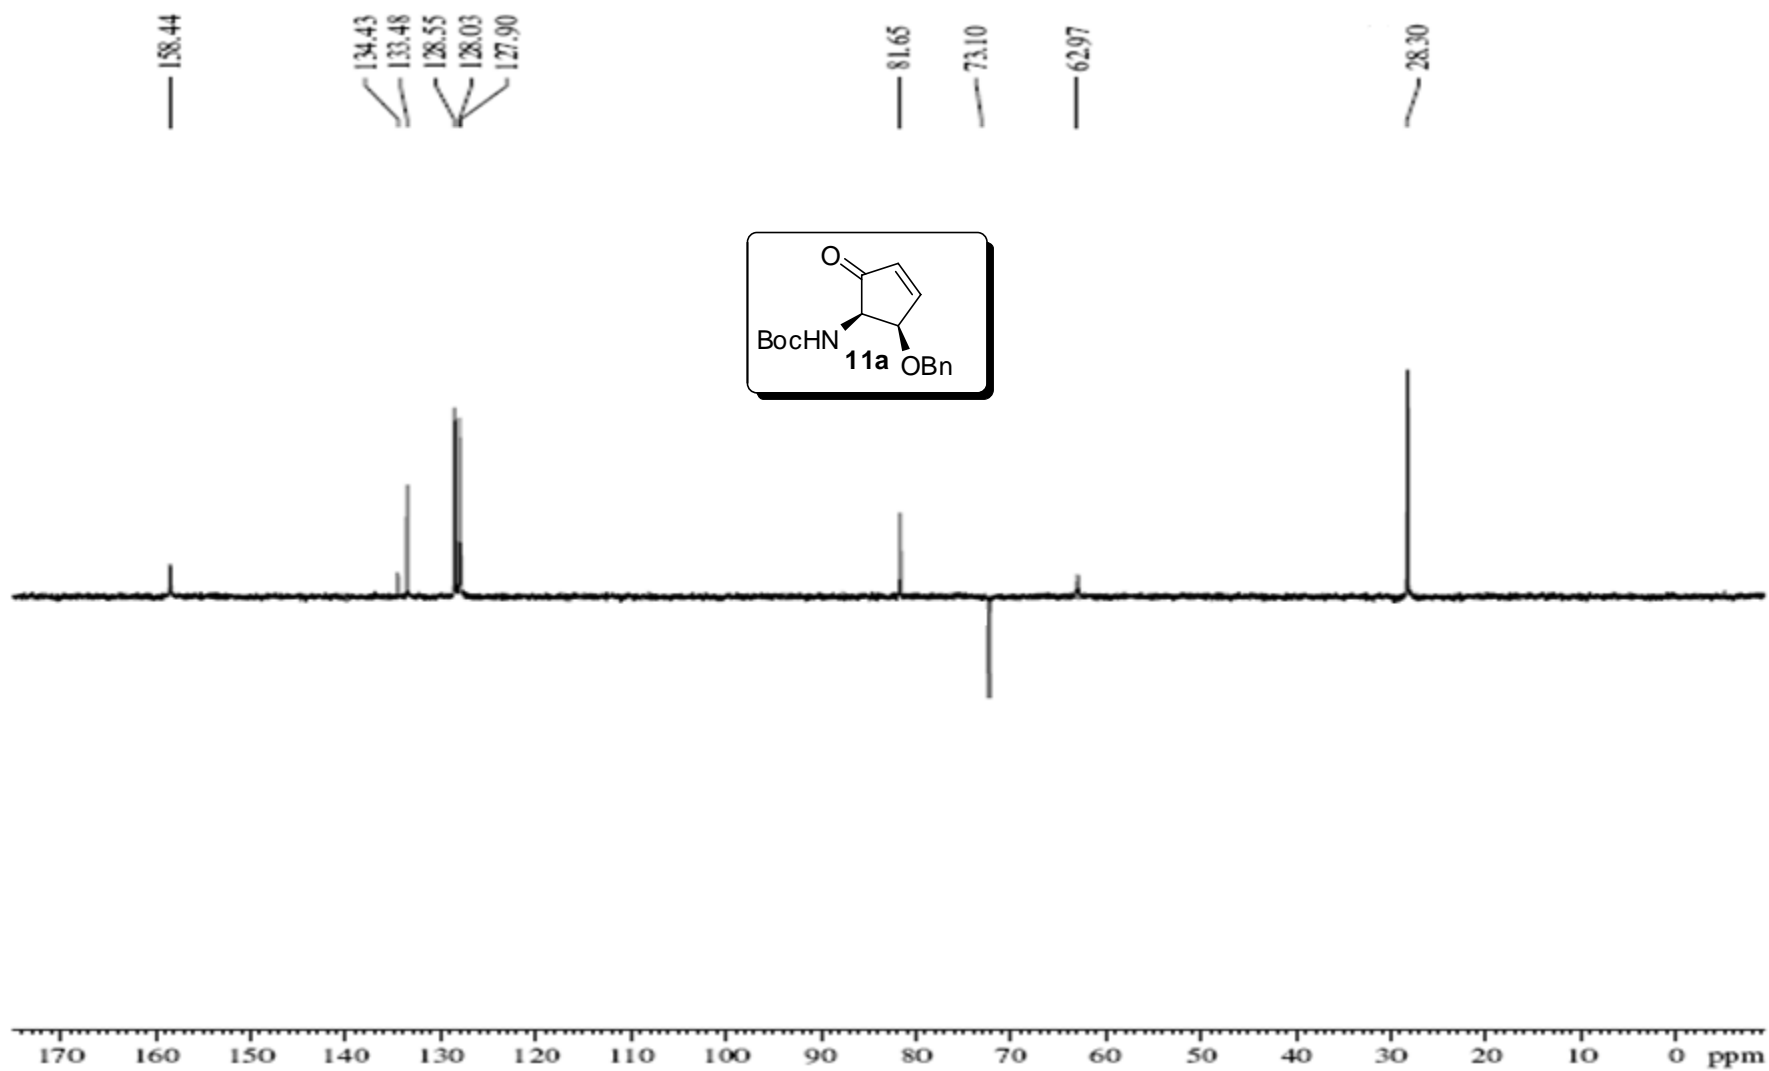

**Fig 11: DEPT NMR Spectra of Compound 11a.**

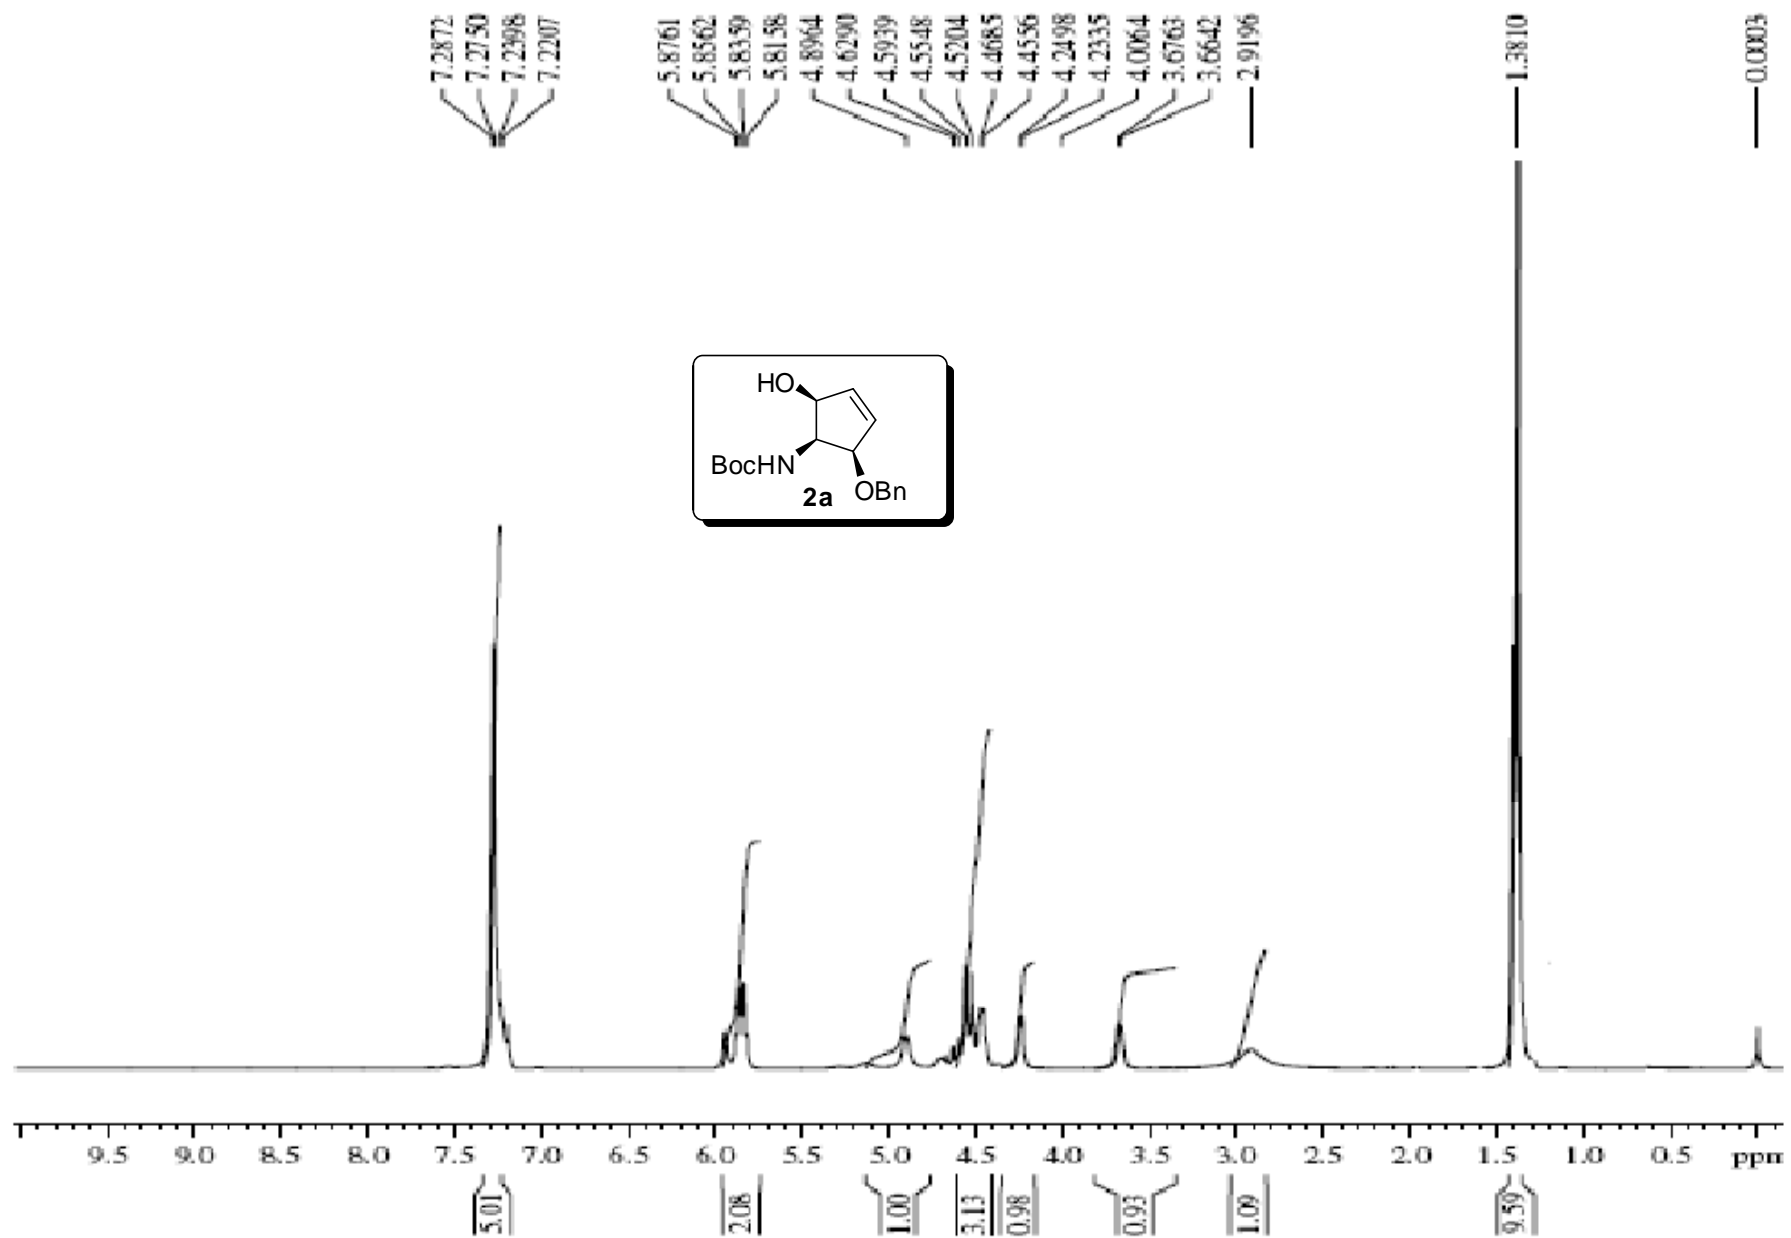

**Fig 12: <sup>1</sup>H NMR of Compound 2a.**



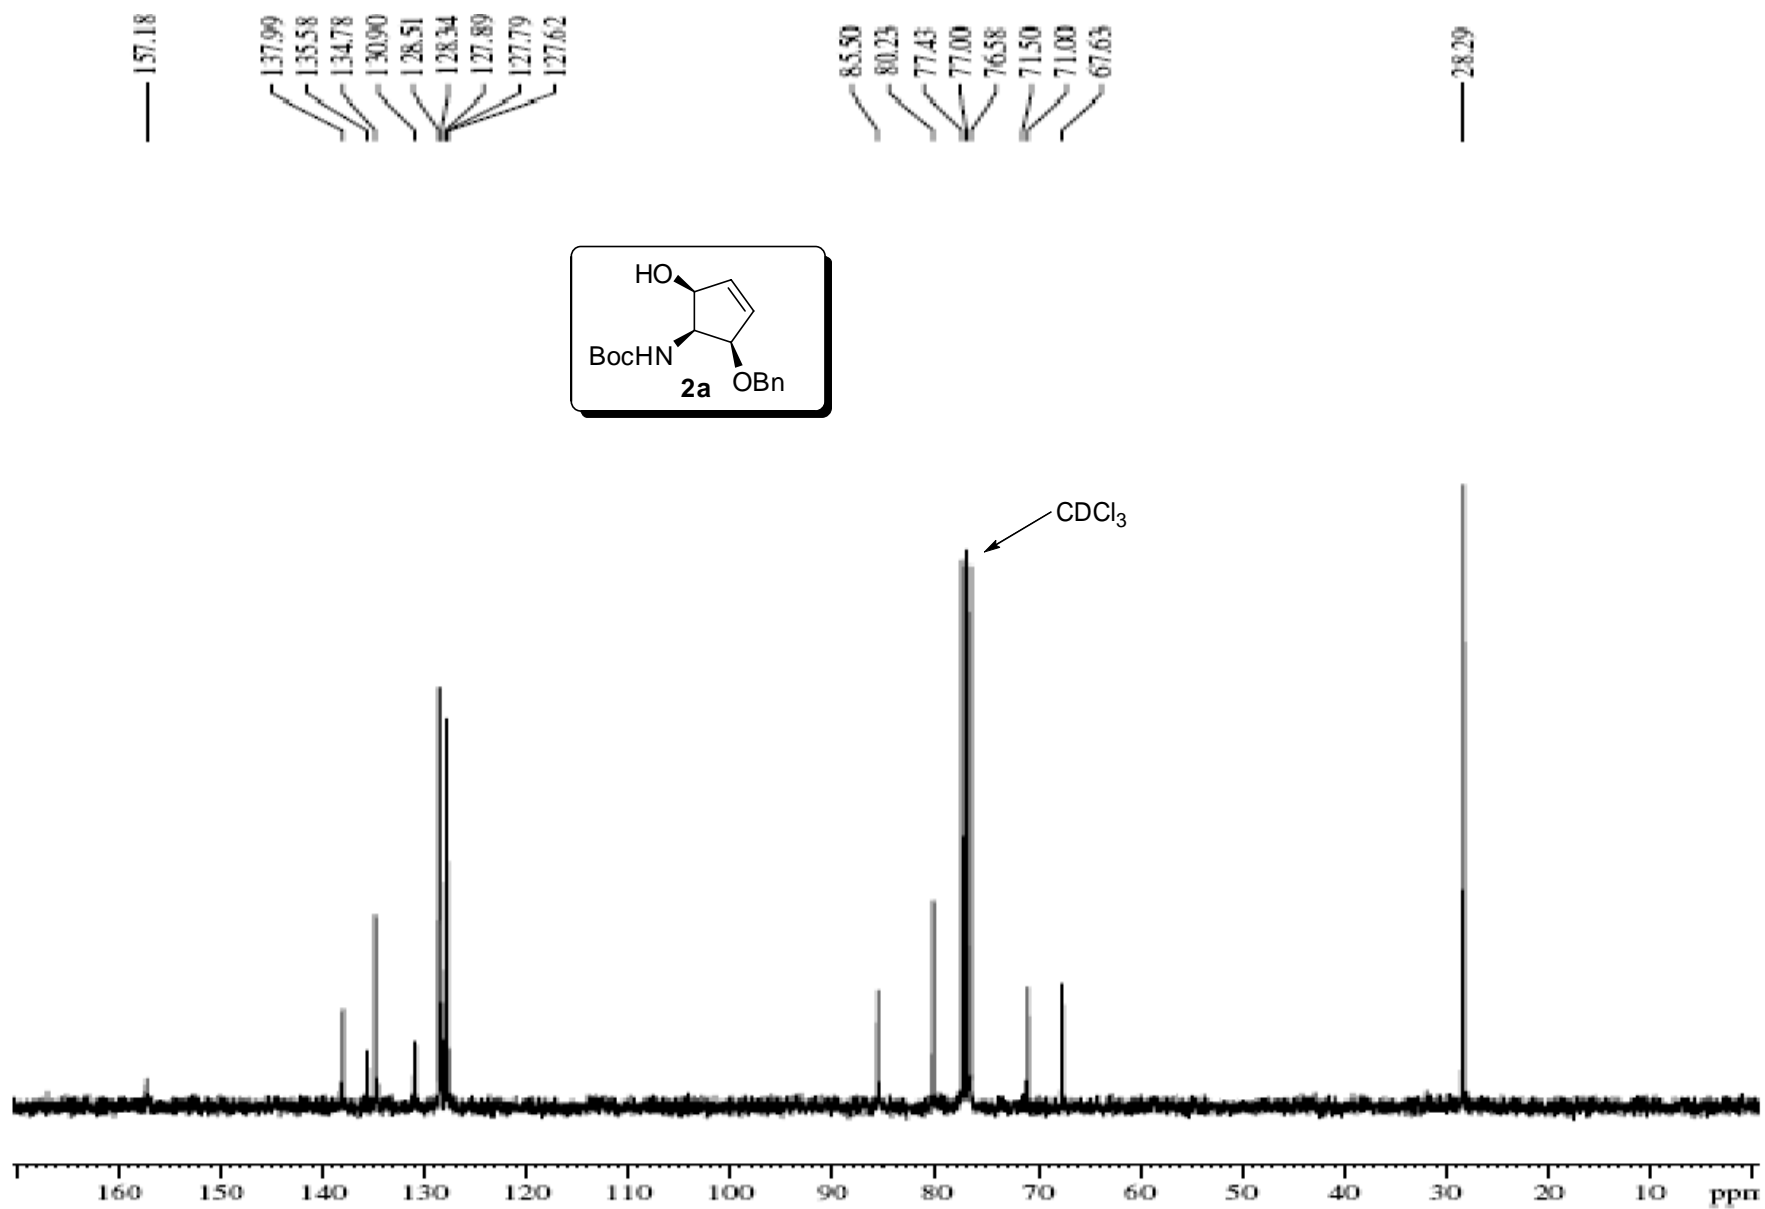

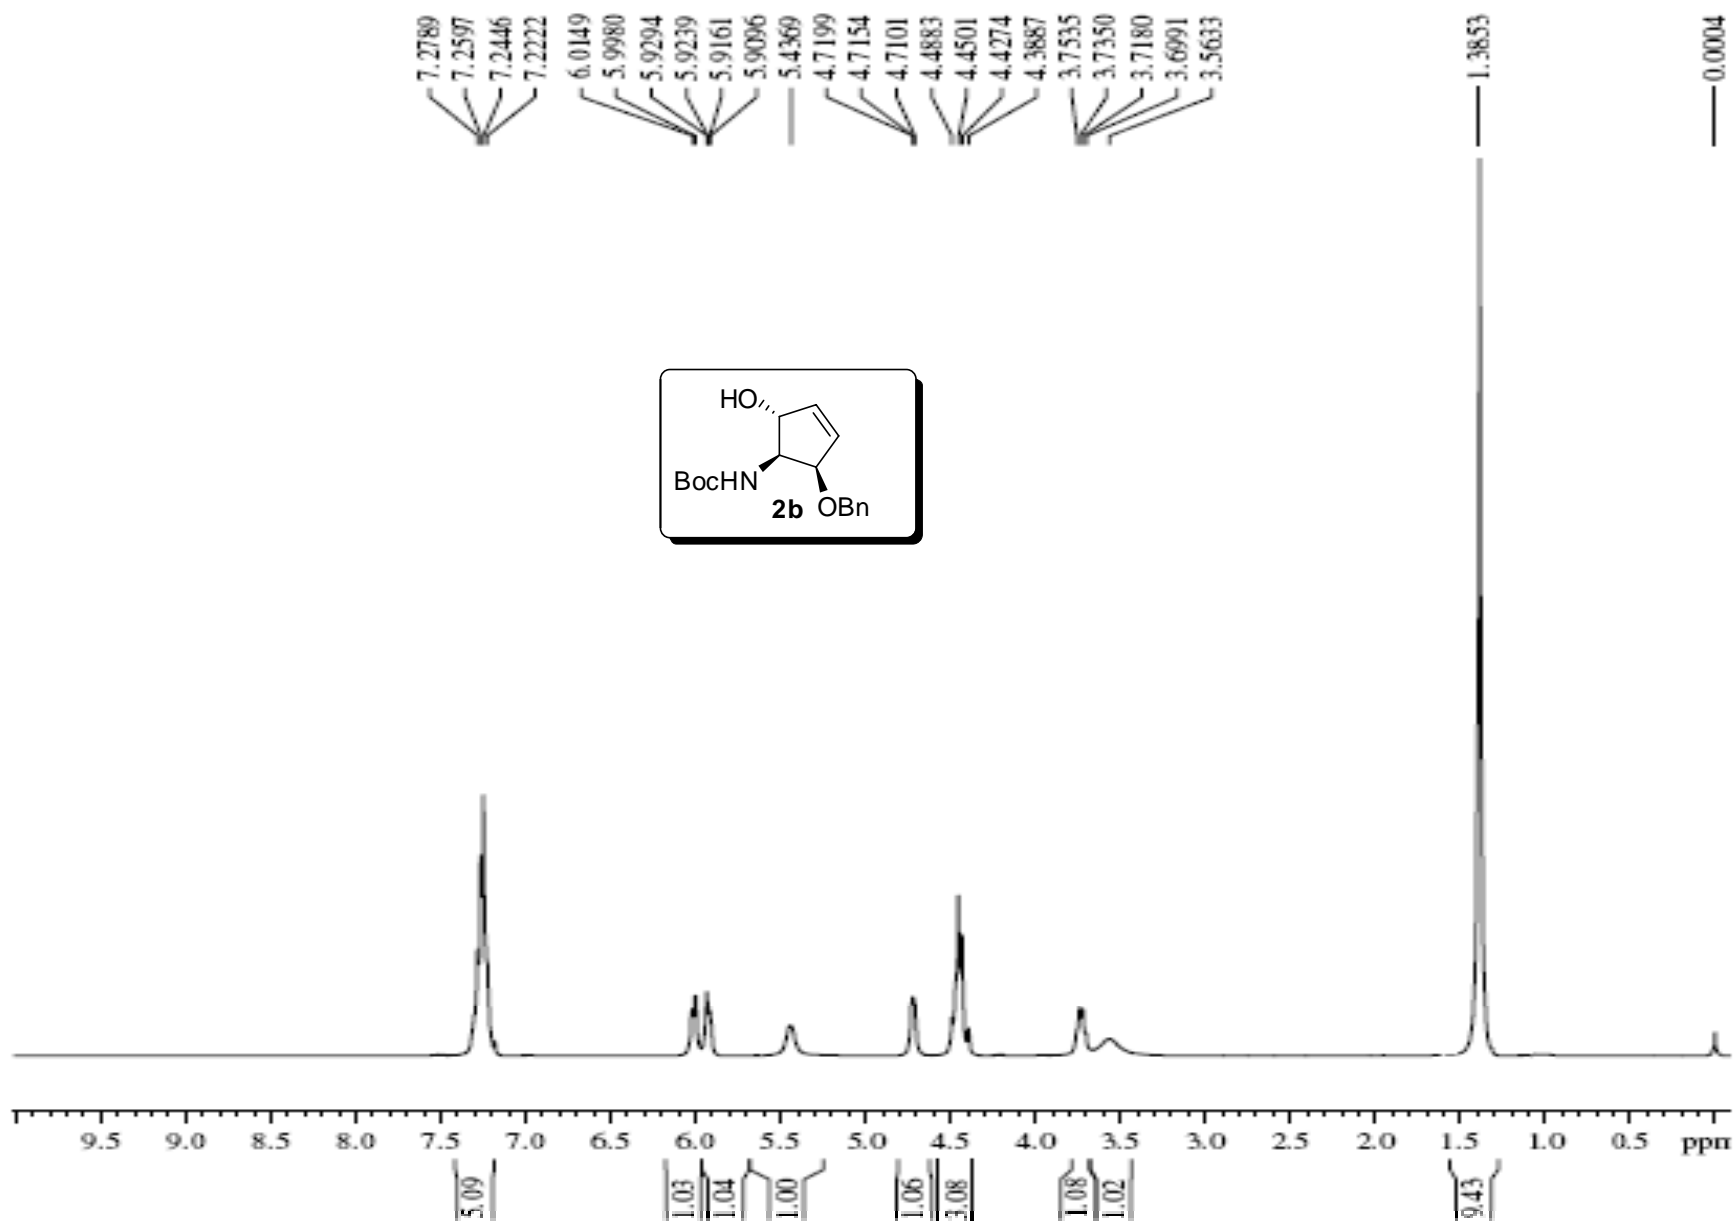

Fig 14: <sup>1</sup>H NMR of Compound 2b.

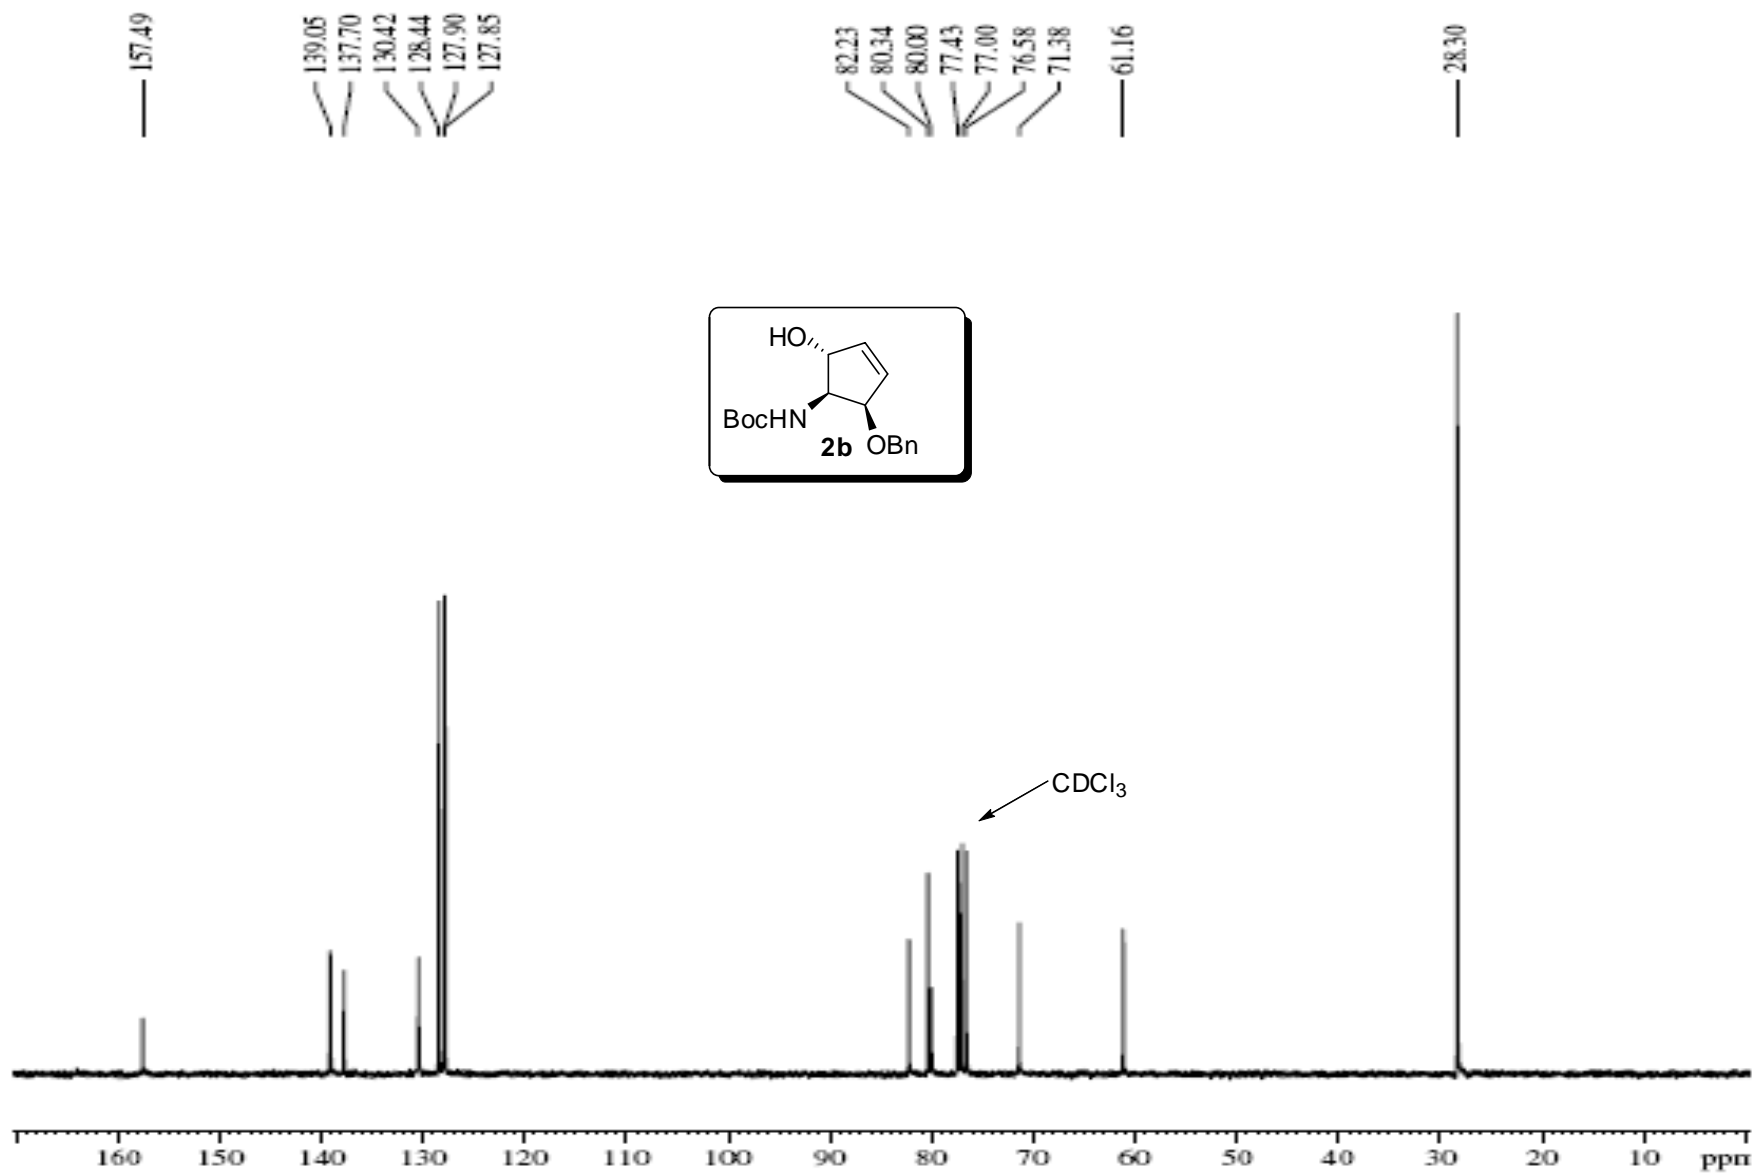

**Fig 15:** <sup>13</sup>C NMR Spectra of Compound **2b**.

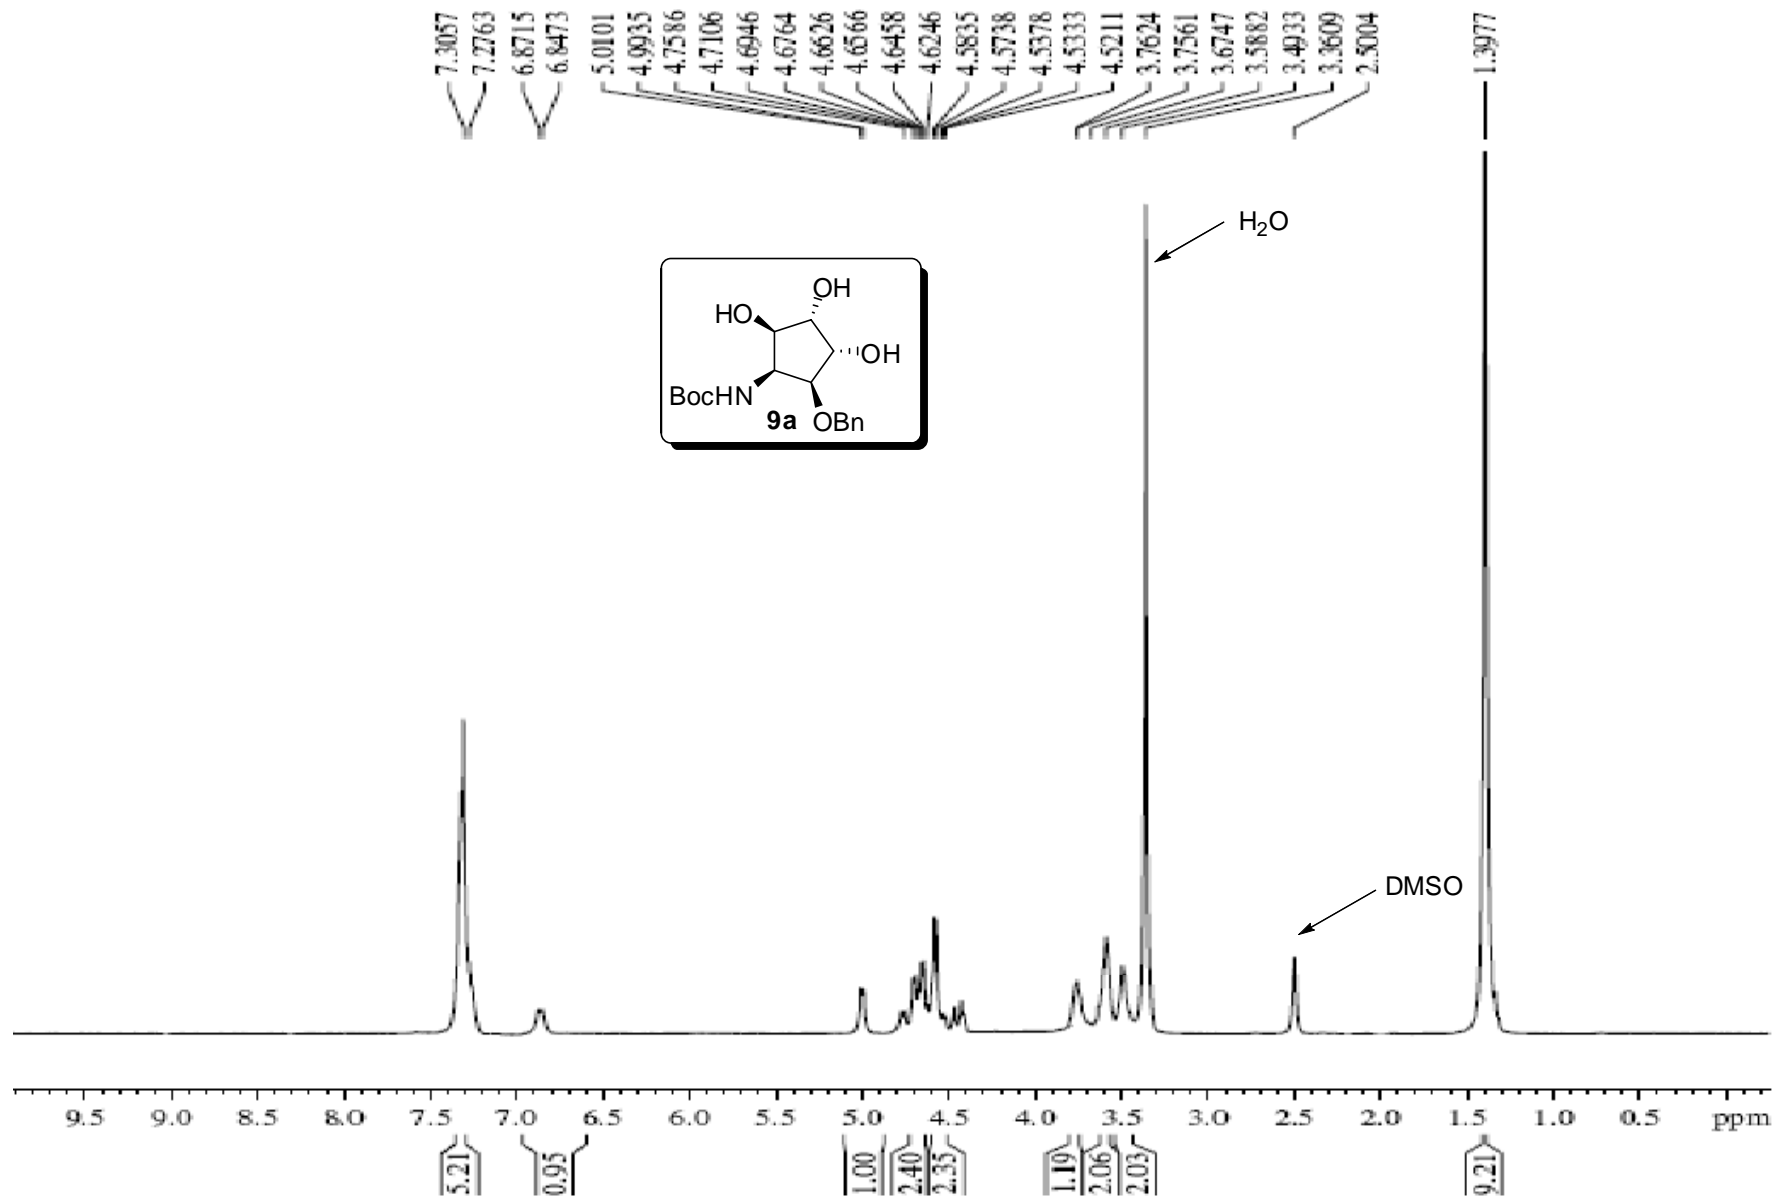

**Fig 16: <sup>1</sup>H NMR of Compound 9a.**

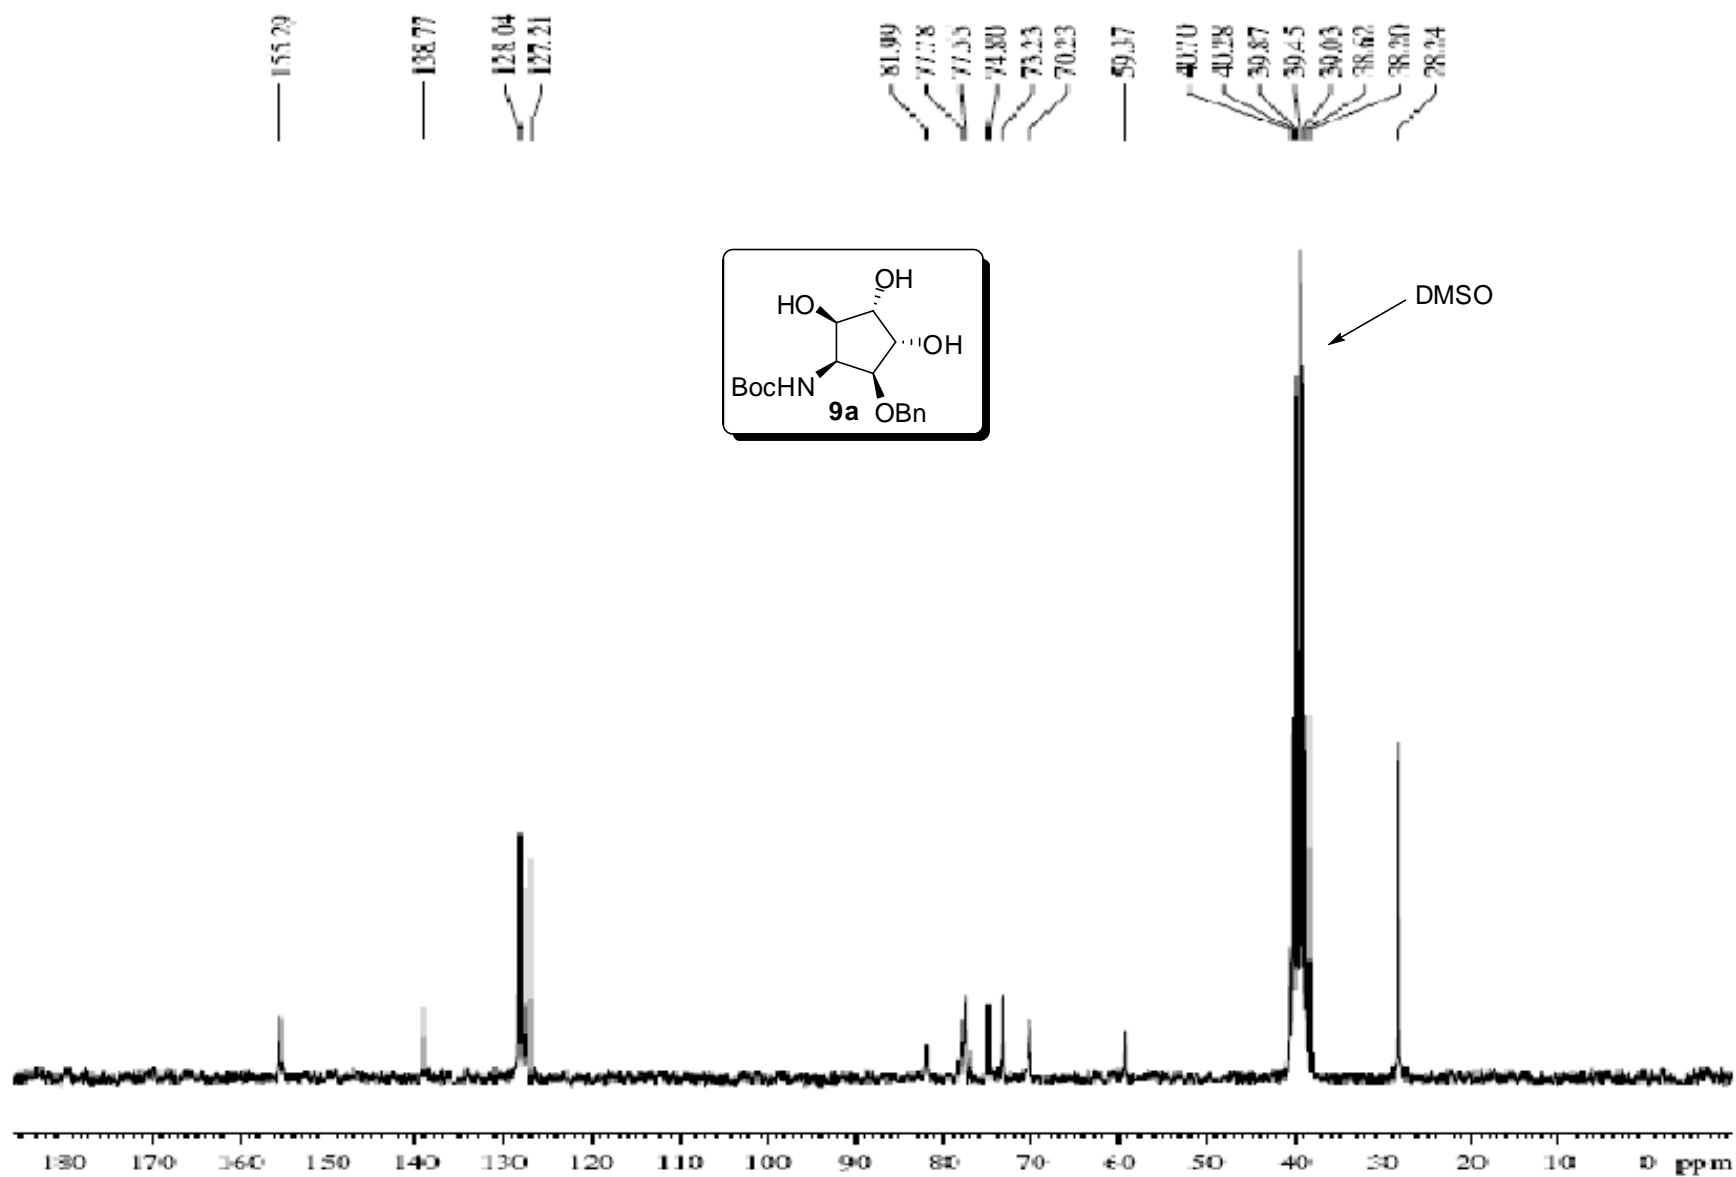

**Fig 17:**  $^{13}\text{C}$  NMR Spectra of Compound **9a**.

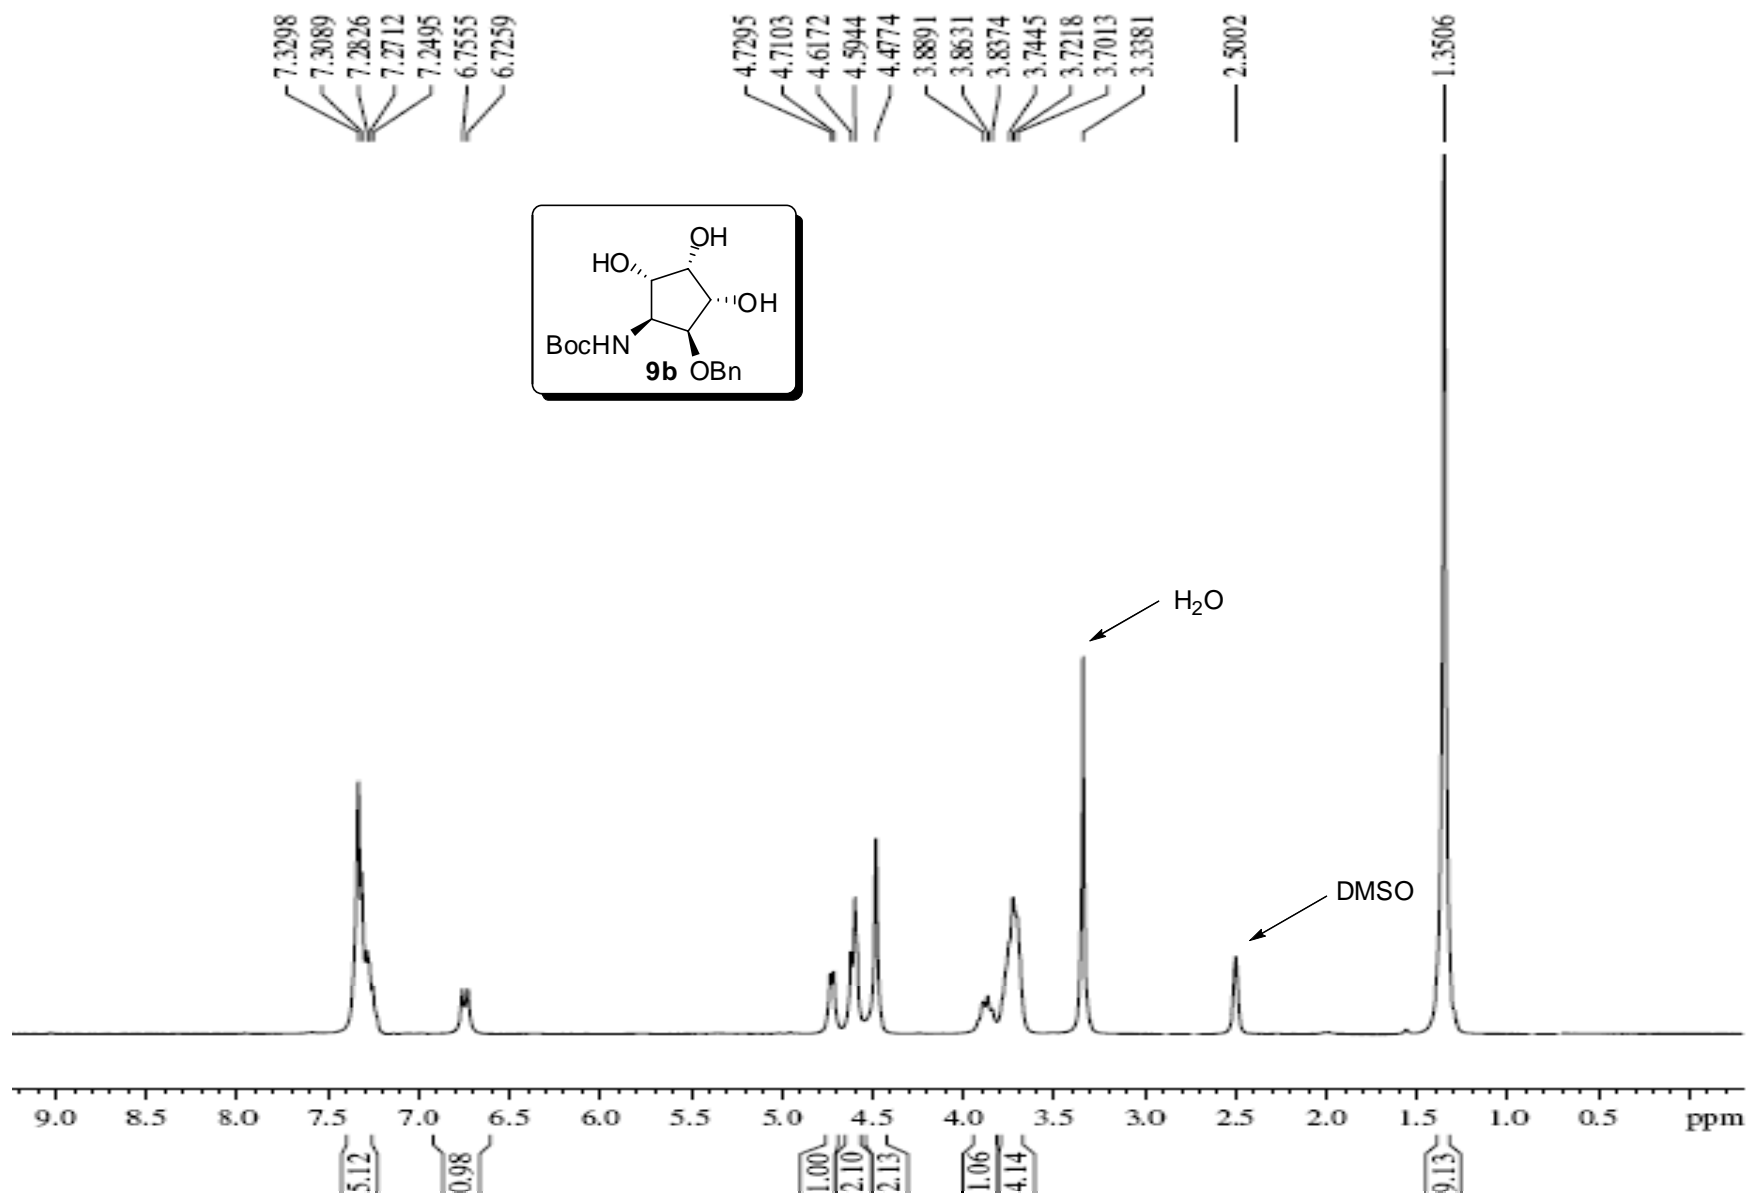

**Fig 18:  $^1\text{H}$  NMR of Compound 9b.**

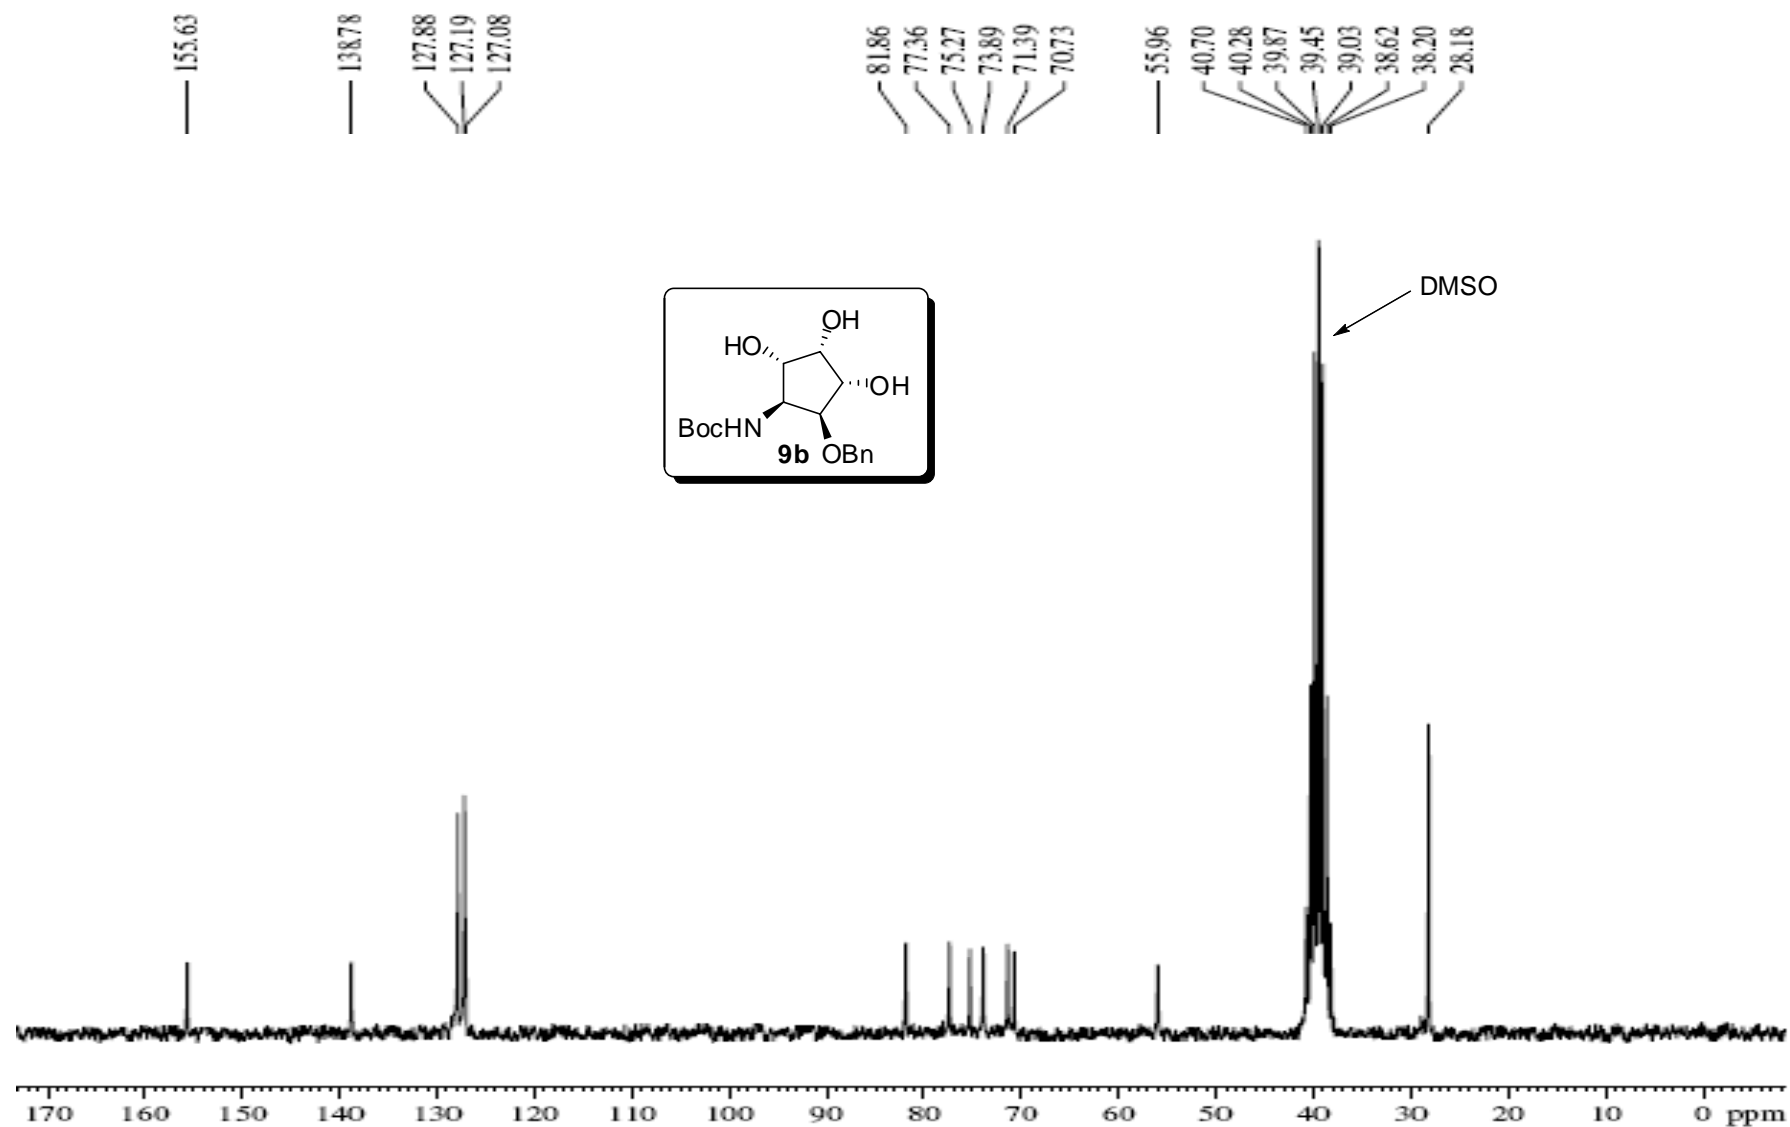

**Fig 19:**  $^{13}\text{C}$  NMR Spectra of Compound **9b**.

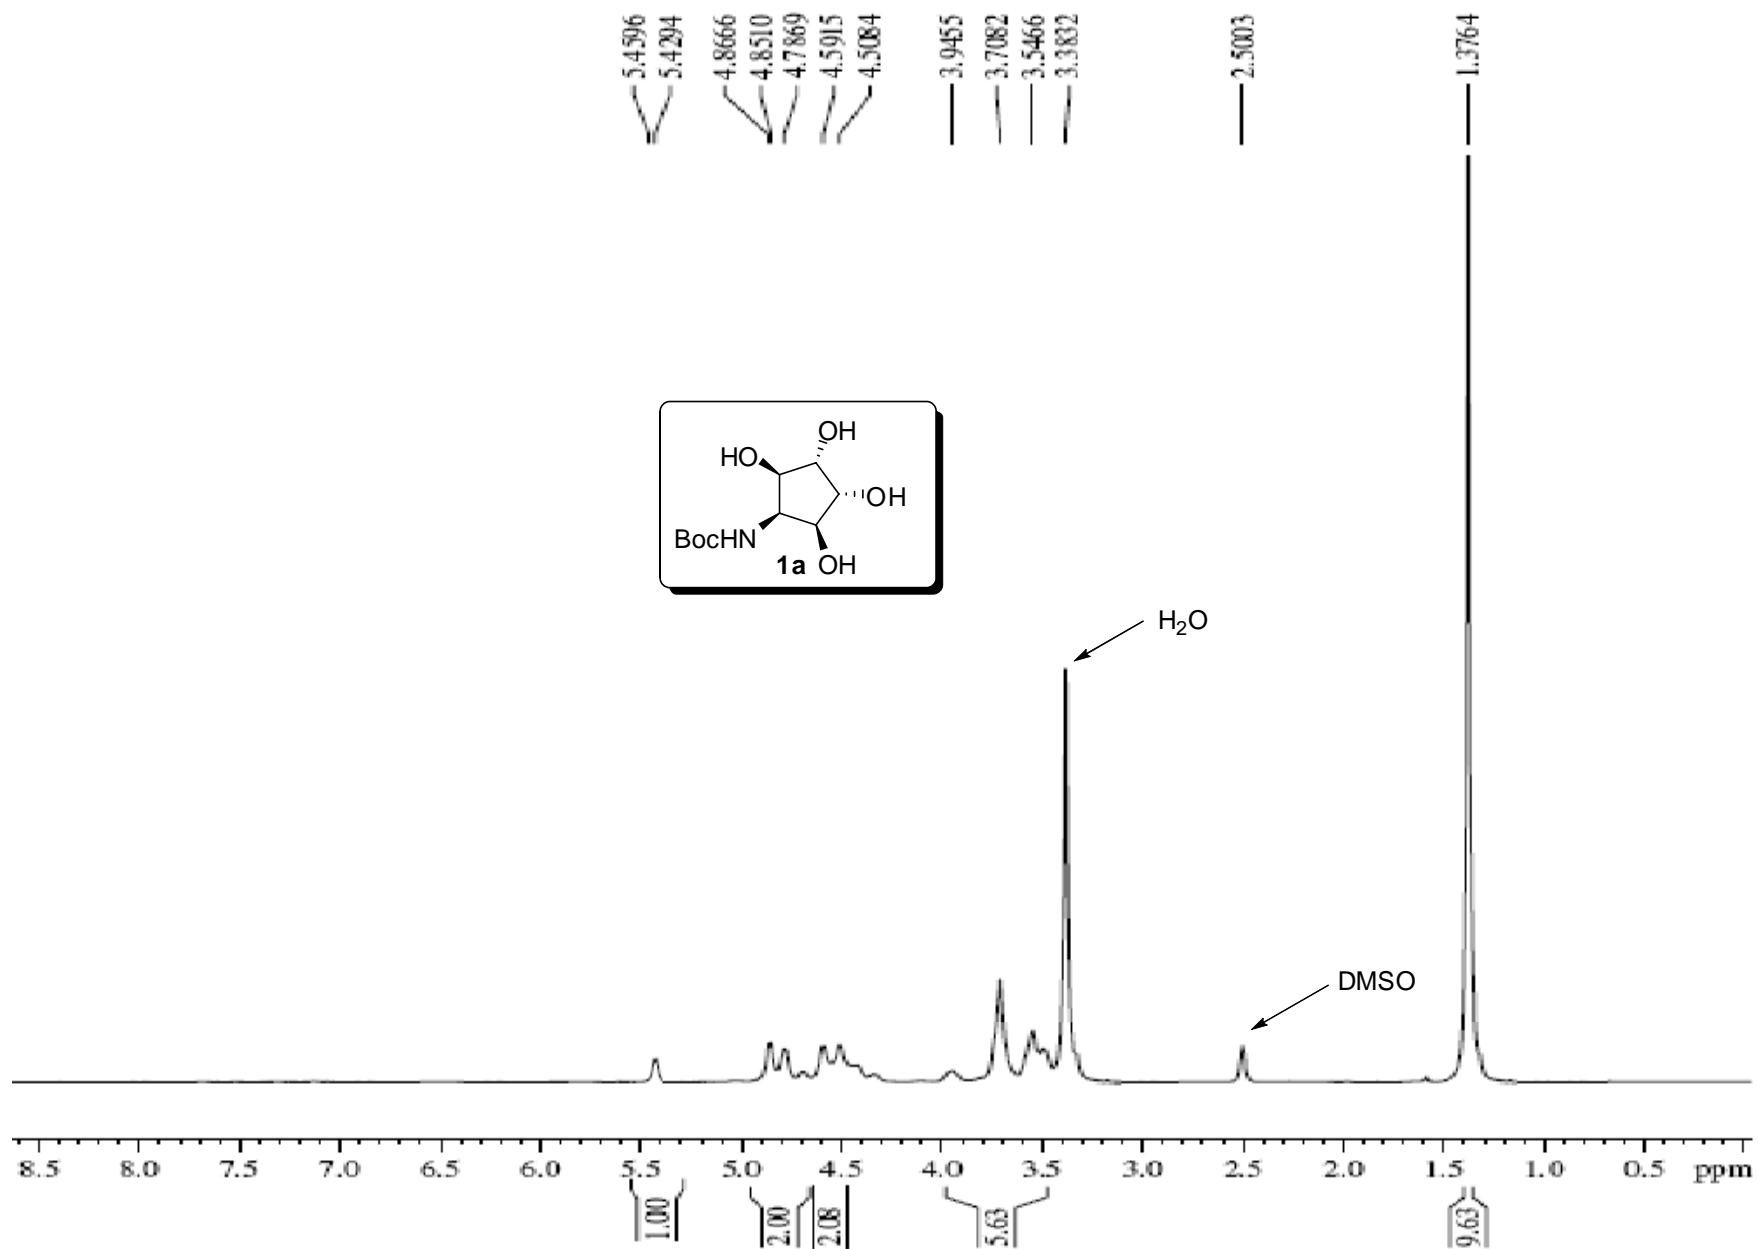

**Fig 20: <sup>1</sup>H NMR of Compound 1a.**



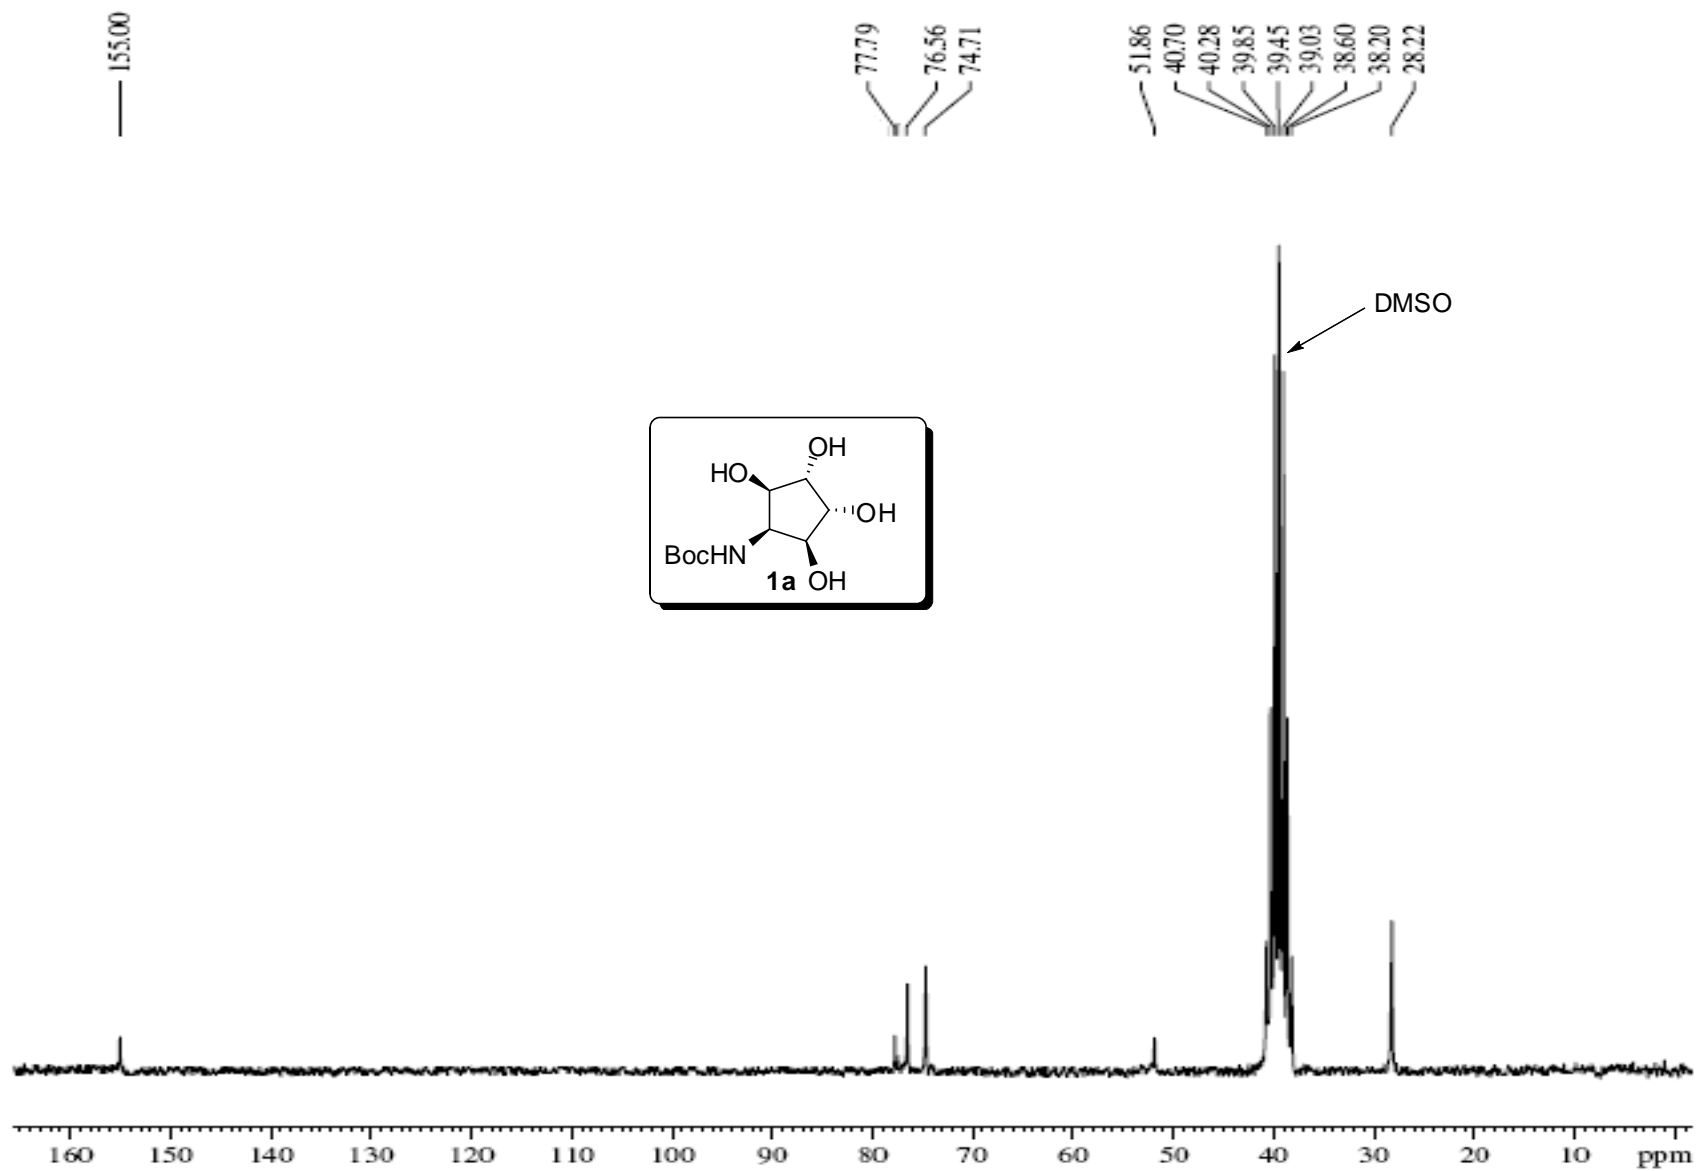

**Fig 21:  $^{13}\text{C}$  NMR Spectra of Compound 1a.**

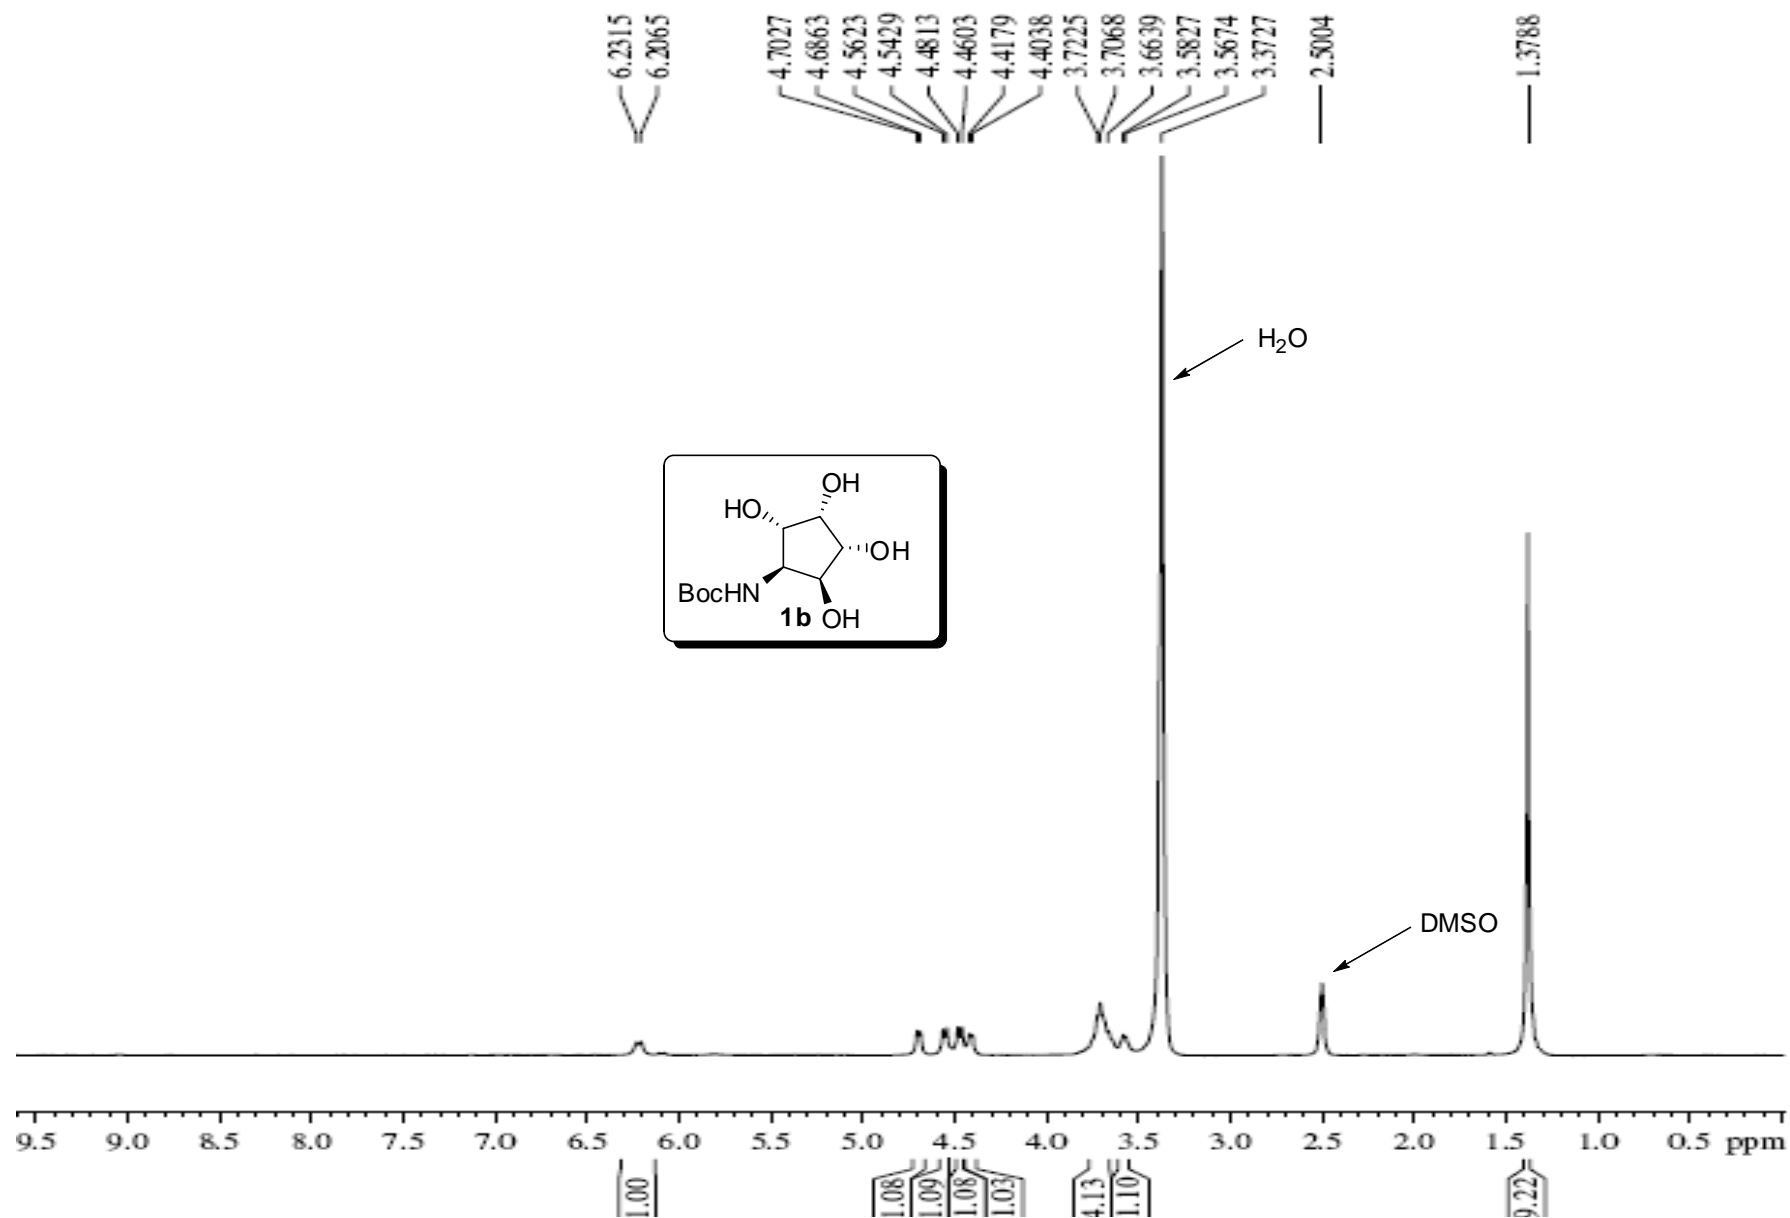

**Fig 22:  $^1\text{H}$  NMR of Compound 1c.**

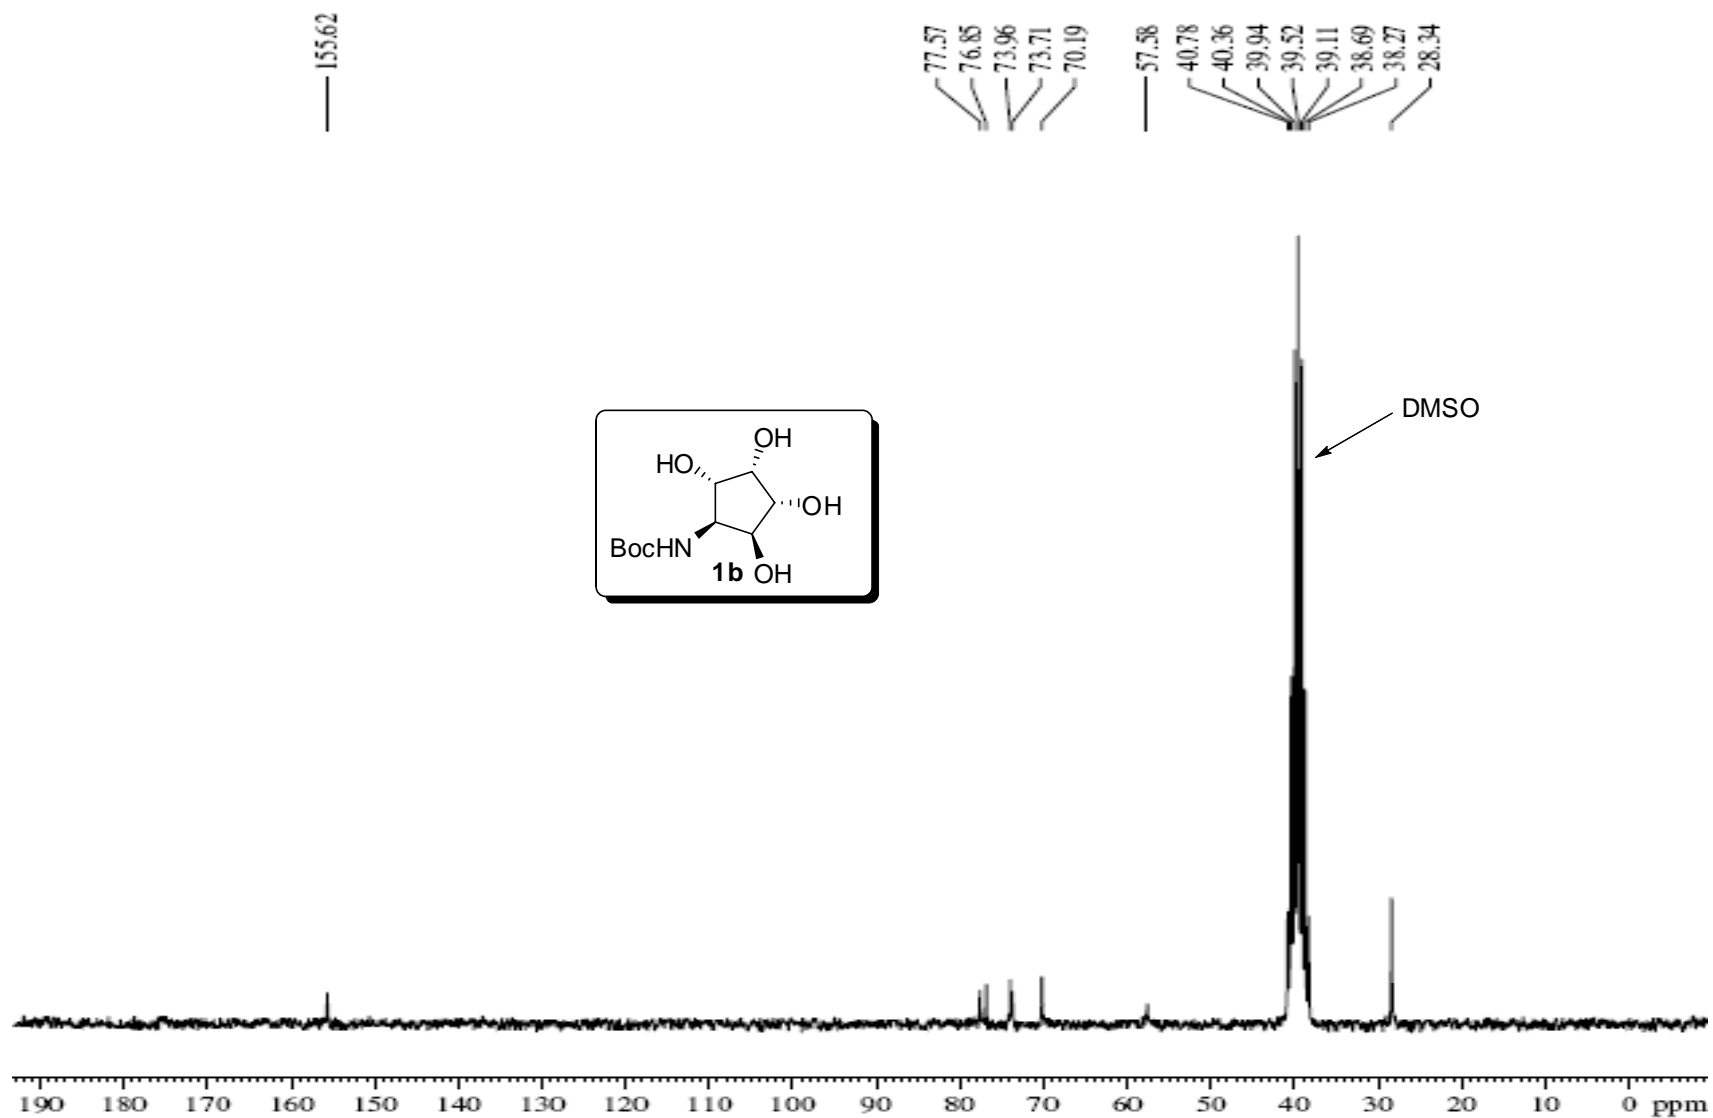

**Fig 23:**  $^{13}\text{C}$  NMR Spectra of Compound **1c**.

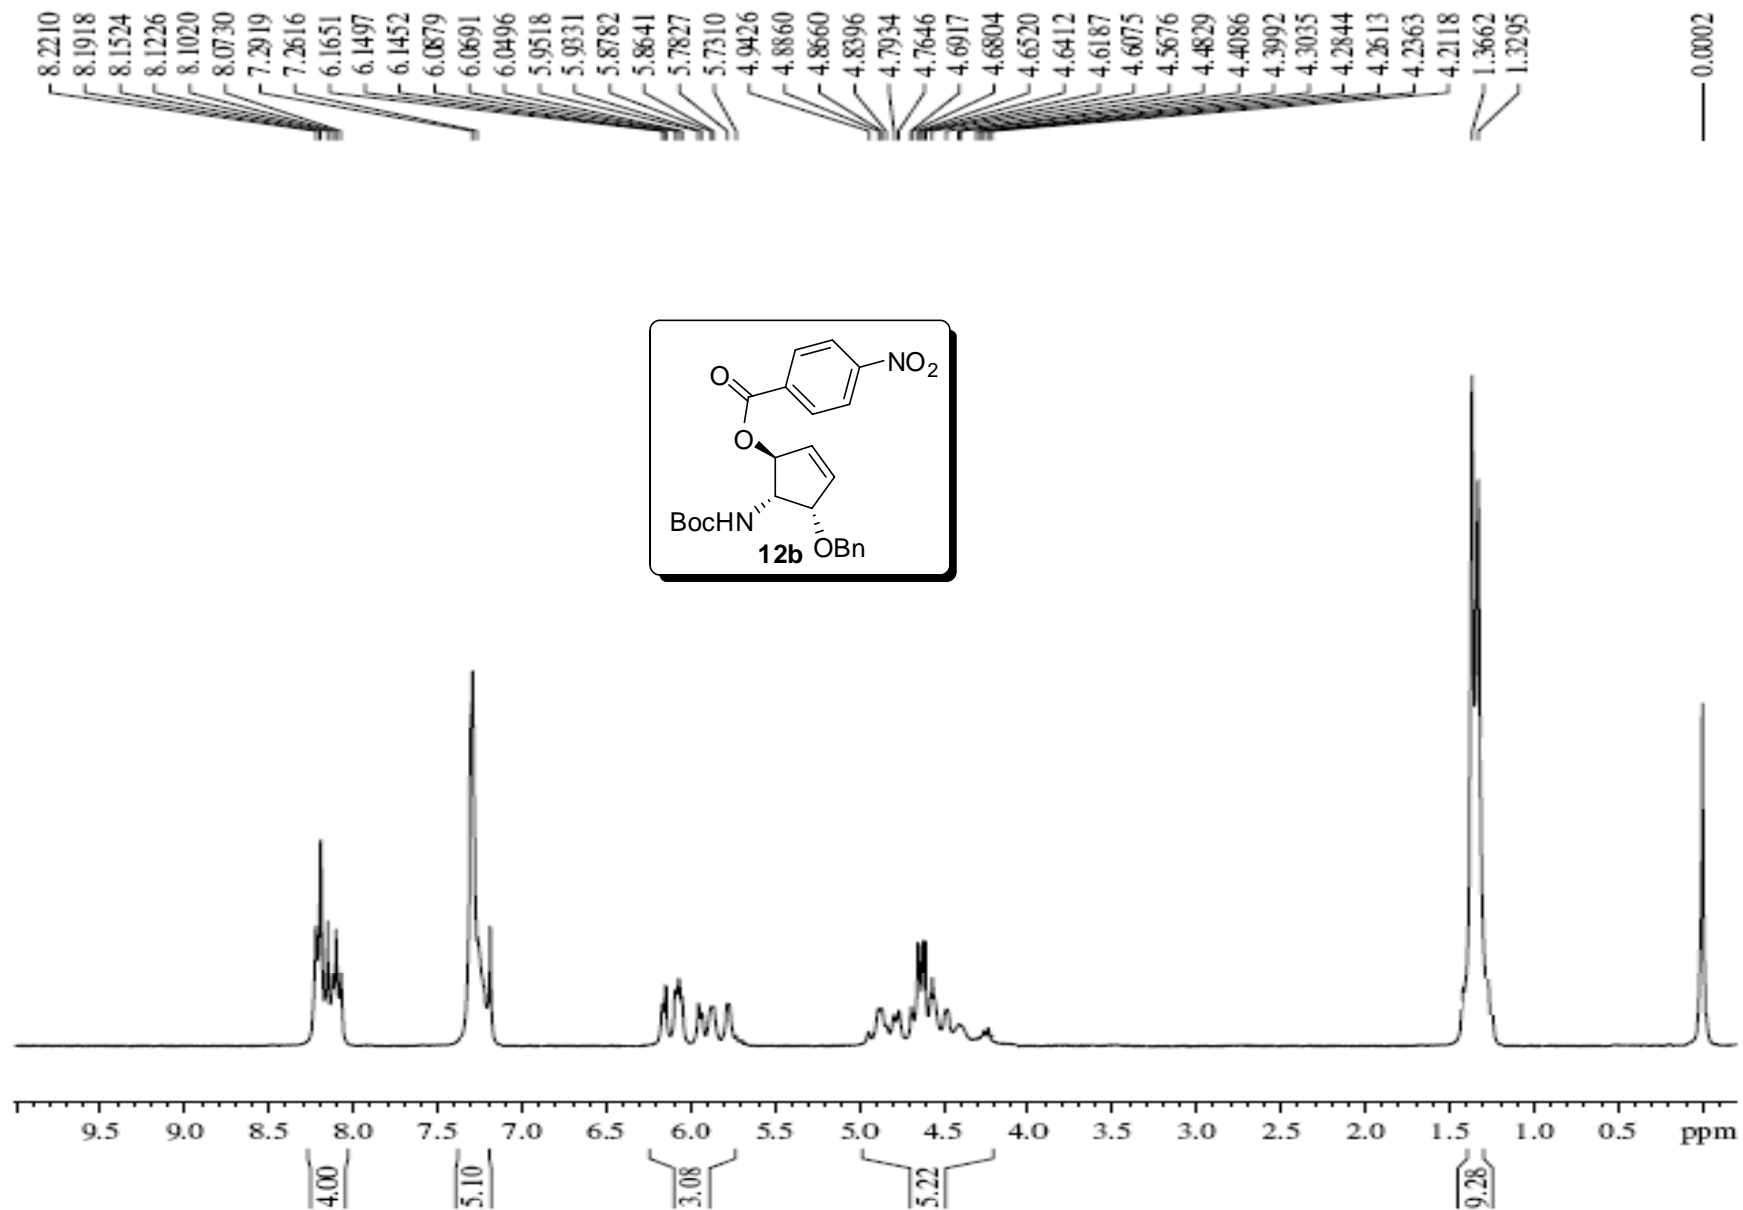

**Fig 24: <sup>1</sup>H NMR of Compound 12b.**
